1  
2  
3  
4  
5  
6  
7  
8  
9  
10  
11  
12  
13  
14  
15  
16  
17  
18  
19  
20  
21  
22  
23  
24  
25  
26  
27  
28

**Metagenome-wide measurement of protein synthesis in the human fecal microbiota using  
MetaRibo-Seq**

Brayon J. Fremin<sup>1</sup> and Ami S. Bhatt<sup>1,2\*</sup>

<sup>1</sup>Department of Genetics, Stanford University, CA, 94305, USA

<sup>2</sup>Department of Medicine (Hematology), Stanford University, CA, 94305, USA

\*Correspondence: [asbhatt@stanford.edu](mailto:asbhatt@stanford.edu)

29 **Abstract**

30

31           The healthy human fecal microbiota is too diverse to comprehensively study with the  
32 current throughput of proteomic methods. Shotgun sequencing technologies allow for much  
33 more comprehensive profiling. Here, we develop and apply MetaRibo-Seq, a method for  
34 simultaneous ribosome profiling of multiple taxa within a complex bacterial community. This  
35 approach captures taxonomic diversity in fecal samples. As expected, the detected ribosome-  
36 bound transcripts are relatively enriched within coding regions and significantly correlate to  
37 detectable protein abundances. In a low diversity fecal sample, we show that MetaRibo-Seq is  
38 more strongly correlated than metatranscriptomic data to protein abundance. This significant  
39 correlation of metatranscriptomics and MetaRibo-Seq with protein levels is maintained, though  
40 with decreased strength as taxonomic diversity increases. Finally, we identify genes that are  
41 consistently regulated at the translational level across bacterial taxa within fecal communities. In  
42 conclusion, MetaRibo-Seq enables comprehensive translational profiling in complex bacterial  
43 communities for the first time.

44

45

46

47

48

49

50

51

52

53

54

55

56

57

58

59

## 60 **Introduction**

61 There is great interest in determining the potential functions of the human fecal microbiota.  
62 To date, methods have excelled at describing the taxonomy of such communities; however,  
63 assigning and defining functions of the community of bacteria or individual organisms within  
64 these communities has been challenging<sup>1</sup>. An ideal method to study functions within a complex  
65 community would allow simultaneous enumeration of all of the proteins, lipids, and other  
66 macromolecules within the mixture. Unfortunately, this is not feasible with current technologies.  
67 While  $10^2$  to  $10^4$  proteins can be simultaneously quantified with metaproteomics<sup>2</sup>, it is  
68 challenging to obtain accurate measurements of the full array of bacterial proteins that likely  
69 exist in human fecal samples, estimated to be  $10^7$  to  $10^8$  proteins<sup>3</sup>. Thus, current proteomic  
70 methods lack the dynamic range required to comprehensively study the human fecal microbiota<sup>4</sup>.

71 Given the challenges in direct protein measurement and need for databases of protein  
72 sequences, some have focused on enumerating the gene content of a community to determine the  
73 potential function; indeed, progress has been made in predicting genes present within a  
74 metagenome<sup>5</sup>. However, the presence of a gene in a complex bacterial community does not  
75 imply that the gene is transcribed or translated. Acknowledging this limitation, recent work has  
76 demonstrated that differential transcription of bacterial genes can be used to derive biologically  
77 meaningful insights<sup>6,7,8,9</sup>. Yet, we still have a very limited understanding of regulation occurring  
78 post-transcriptionally in the human fecal microbiota.

79 In contrast to transcriptomic profiling, ribosome profiling (Ribo-Seq) is a method that  
80 quantifies protein synthesis<sup>10</sup>. In eukaryotes, Ribo-Seq generally correlates more strongly to  
81 protein abundance than transcriptomics<sup>11,12,13</sup>; this correlation has not been described in bacteria.  
82 Bacterial ribosome profiling studies have been performed in model organisms such as  
83 *Escherichia coli* and *Bacillus subtilis*, with minor modifications from the eukaryotic protocols,  
84 such as using chloramphenicol to inhibit translation and micrococcal nuclease (MNase) to enrich  
85 for ribosome footprints<sup>13,14,15,16,17</sup>. These methodological modifications enable a high-throughput  
86 snapshot of translation, but often compromise the ability to achieve codon-level resolution<sup>11</sup>.

87 In bacteria, many genes are regulated at the translational level. For example, genes  
88 involved in translation itself are known to be regulated at a translational level via feedback  
89 mechanisms<sup>18,19,20,21,22</sup>. Translational regulation is critical for generating proteins at the correct  
90 stoichiometry for many protein complexes. For example, the multiprotein complex that forms

91 bacterial ATP synthase has multiple genes whose translation is regulated; the stoichiometry of  
92 this complex is best predicted by Ribo-Seq<sup>13,17</sup>. This even extends to pathway-specific enzyme  
93 stoichiometry in which protein synthesis remains conserved as compensation for transcript  
94 abundance and architecture divergence across taxa<sup>17</sup>. Moreover, specific translational regulation  
95 has been extensively observed upon a variety of perturbations to bacteria<sup>23,24,25,26,27,28,29</sup>. For  
96 example, bacteria employ translational quality control and regulation of amino acid biosynthesis  
97 in response to amino acid stress<sup>30</sup>. Thus, translation is a conserved, critical, dynamic, and  
98 regulated process in bacteria. However, this level of regulation has thus far been overlooked in  
99 mixed bacterial communities. Previous studies of protein synthesis in bacteria have been  
100 restricted to pure large-scale cultures (media and RNA inputs up to liters and milligrams,  
101 respectively). To date, studying translational regulation in mixed communities or in culture-free  
102 contexts has been hindered by low extraction yield, low purity, and the lack of informatic  
103 frameworks to study organisms without reference genomes. Consequently, we have a very  
104 limited understanding of how widespread bacterial translational regulation may be outside of  
105 cultured model organisms.

106 In this work, we develop a method that allows for simultaneous ribosome profiling in a  
107 complex community of bacteria without the need for a large-scale, purified cultures. With three  
108 lines of evidence, we confirm that MetaRibo-Seq effectively enables translation to be studied in  
109 the fecal microbiota. First, the signal consists of footprints that capture the taxonomic diversity  
110 of metagenomics, while being locally enriched within coding regions. We identify most  
111 enrichment at gene start and stop codons, characteristic of chloramphenicol-treated ribosome  
112 profiling<sup>31</sup>. Second, ribosome footprint densities significantly correlate to detectable protein  
113 abundances and are significantly enriched in signal for these abundant proteins in these complex  
114 bacterial communities. In low diversity human fecal samples, we show that MetaRibo-Seq better  
115 correlates with protein abundance and *E. coli* ATP synthase stoichiometry than transcriptomics.  
116 Third, biological processes known to be translationally regulated, such as translation itself, are  
117 consistently detected as such across multiple samples and taxa. We catalog tens of thousands of  
118 genes with evidence of translational regulation in fecal samples across diverse taxa, providing a  
119 widespread view of consistent, bacterial translational regulation in these systems. Overall, we  
120 show that MetaRibo-Seq facilitates metagenome-wide measurement of bacterial protein  
121 synthesis across taxa directly in fecal samples.

122

## 123 **Results**

124

125 The MetaRibo-Seq workflow.

126

127         MetaRibo-Seq enables sequencing of ribosome-protected footprints directly from human  
128 fecal samples (see Methods, Figure 1A). First, we show ribosome profiling can be performed on  
129 frozen fecal samples stored in RNAlater<sup>32, 6</sup> (Ambion), an RNA preserving solution. Unlike  
130 some existing protocols<sup>33,16</sup>, our ribosome profiling protocol first introduces chloramphenicol  
131 during lysis. Bead beating lysis is performed to also lyse diverse Gram-positive bacteria<sup>34</sup>. An  
132 ethanol precipitation step post-lysis is introduced to both filter out fecal debris and concentrate  
133 RNA and any complexes bound. This has been demonstrated to effectively precipitate  
134 ribosomes<sup>35</sup>. MNase treatment is performed on an extremely crude purification of nucleic acids  
135 and complexes. Ribosome profiling performed here uses nearly an order of magnitude less RNA  
136 and MNase than isolate protocols typically use (see Methods)<sup>16, 33</sup>. After high-quality footprints  
137 are reliably generated using these methods, ribosome profiling converges to isolate protocols to  
138 purify monosomes and prepare libraries<sup>33</sup>. MetaRibo-Seq overcome challenges of sample  
139 storage, input requirement, bacterial purity, and uniform lysis to generate high quality RNA  
140 footprints from fecal samples.

141         Computationally, dealing with short reads and poor or incomplete reference genomes is  
142 challenging. To overcome these challenges, we use a *de novo* approach to build references,  
143 annotate genes, and map reads to those references (see Methods, Figure 1B). Mapping metrics to  
144 *de novo* references are provided (Table S1). We require perfect, unique matches of these  
145 ribosome footprints to references to ensure proper mapping. Multi-mapping varies sample to  
146 sample, ranging from 6.95 to 26.69 percent. We find that 4.1 - 10.4 percent of mapped reads  
147 from RNA technologies performed correspond to predicted coding regions. Given variable  
148 amounts of diversity and heterogeneity in any given sample, mapping statistics will vary sample  
149 to sample.

150

151 MetaRibo-Seq signal retains taxonomic diversity in human fecal samples.

152

153           MetaRibo-Seq captures taxonomic bacterial diversity in human fecal samples via  
154 ribosome-protected footprints. We perform MetaRibo-Seq on four diverse fecal samples. Sample  
155 A is from a healthy individual. Sample B is from a patient with a hematological disorder who is  
156 undergoing treatment. Sample C is from a patient with a solid malignancy who is undergoing  
157 treatment. Sample D is from a patient with Alzheimer’s disease. We also perform MetaRibo-Seq  
158 on a low diversity fecal sample from a patient with a hematological disorder who is undergoing  
159 antibiotic treatment with metronidazole – Sample E. Metagenomic reads are subjected to *de novo*  
160 assembly and gene prediction and annotation for each sample (see Methods). These assemblies  
161 and gene predictions are provided (NCBI BioProject #####). Taxonomic differences at the genus  
162 level exist between technologies across samples, though most abundant taxa are largely  
163 consistent across technologies (Figure 2A). Shannon diversity is also concordant between  
164 technologies, including MetaRibo-Seq (Figure 2B). Thus we conclude that MetaRibo-Seq signal  
165 faithfully recapitulates the diversity of organisms present in the mixed bacterial communities.  
166  
167 MetaRibo-Seq signal is characteristic of bacterial ribosome profiling.

168  
169           We find that MetaRibo-Seq signal is locally enriched within coding regions. We show  
170 average signal across all coding predictions and flanking regions for Samples A, B, C, and D  
171 (Figure 3A-D). We visualize strong signal corresponding to predicted ORFs with pronounced  
172 signal drop off outside of the start and stop codons for samples A through D (Figure 3A-D).  
173 Start and stop codons represent the strongest signal. Surprisingly, MetaRibo-Seq also shows  
174 some weak signs of overall codon resolution (Figure S1). In a more targeted analysis, MetaRibo-  
175 Seq can achieve stronger codon resolution of ribosomes in common genera. For Sample A and  
176 Sample B, assembled contigs of several shared genera are classified and binned appropriately  
177 (see Methods). Triplet periodicity is observed across footprint lengths in *Bacteroides* (Figure  
178 S2A), *Faecalibacterium* (Figure S2B), and *Alistipes* (Figure S2C). Based purely on raw signal,  
179 these findings collectively suggest that MetaRibo-Seq is capturing ribosome-bound footprints as  
180 expected.

181  
182 MetaRibo-Seq outperforms metatranscriptomics as a proxy for protein abundance in a low  
183 diversity fecal sample.

184

185           In Sample E, we identify strong correlations of metatranscriptomics and MetaRibo-Seq to  
186 metaproteomics. First, Sample E is dominated by *E. coli*. Interestingly, this *E. coli* is later isolated  
187 from the blood of the patient with no single nucleotide variants compared to fecal *E. coli*<sup>36</sup>. This  
188 blood isolate has been sequenced and represents our isolate reference for downstream analyses.  
189 In a separate study demonstrating strain identity, this patient is denoted as Patient 3, and Sample  
190 E in this study is specifically 27 days prior to bacteremia<sup>36</sup>. For the 1503 genes that were  
191 proteomically-detected in Sample E, we show genus-level representation for  
192 metatranscriptomics, MetaRibo-Seq, and metaproteomics (Figure 4A). Of note, 812 of these  
193 proteins belong to *E. coli*, while the remaining 691 belong to other taxa. There is greater  
194 representation of proteins predicated to arise from *Klebsiella* and *Enterococcus* than transcripts  
195 or MetaRibo-Seq signal (Figure 4A). We show a Pearson correlation of 0.46 between MetaRibo-  
196 Seq and metaproteomics across the 1503 detected proteins from the metagenomic Sample E  
197 (Figure 4B). The Pearson correlation is 0.64 when only considering the 928 detected proteins  
198 from the *E. coli* isolate reference (Figure 4C). We display correlations between  
199 metatranscriptomics, MetaRibo-Seq, and metaproteomics (Figure 5D). Same technology  
200 correlations between the 812 identical protein predictions from the metagenomic and isolate *E.*  
201 *coli* analyses all retain Pearson correlations of 0.99. Correlations are weaker in the metagenomic  
202 context specifically due to relatively poorer predictions upon addition of the 691 proteins that do  
203 not belong to *E. coli*. No previous study to our knowledge provides a correlation between  
204 ribosome profiling and proteomics in *E. coli* or any other bacteria; however, this correlation of  
205 0.64 is stronger than any cited correlation between transcriptomics and proteomics in isolated,  
206 cultured, model *E. coli*<sup>37</sup>. ATP synthase is a well-characterized complex in terms of  
207 stoichiometry in *E. coli* (Figure 4E). We show that MetaRibo-Seq signal better correlates with  
208 known ATP synthase stoichiometry than transcriptomics, as expected (Figure 4F-G). Among  
209 sequencing technologies, MetaRibo-Seq serves as a better proxy for protein levels and ATP  
210 synthase stoichiometry in Sample E *E. coli*.

211

212 MetaRibo-Seq signal significantly correlates to protein abundance and is enriched in these  
213 proteins in mixed bacterial communities.

214

215 We find that MetaRibo-Seq significantly correlates to protein abundances as measured by  
216 shotgun metaproteomics. In Sample A, we detect 497 proteins. We measure a significant Pearson  
217 correlation of 0.32 between MetaRibo-Seq and metaproteomics (Figure 5A). MetaRibo-Seq is  
218 better correlated with protein abundance than metatranscriptomics in Sample A (Figure 5B). As  
219 expected, both metatranscriptomics and MetaRibo-Seq are significantly enriched in signal for  
220 these 497 proteomically-detected genes (Figure 5C). In Sample B, we detect 480 proteins and  
221 measure a Pearson correlation of 0.34 between MetaRibo-Seq and metaproteomics (Figure 5D).  
222 There is no significant difference in protein abundance prediction between metatranscriptomics  
223 and MetaRibo-Seq in Sample B (Figure 5E). Metatranscriptomics and MetaRibo-Seq are  
224 similarly enriched in signal for these proteins in Sample B (Figure 5F). These proteins detected  
225 by mass spectrometry represent highly abundant bacterial proteins in the fecal samples. These  
226 findings suggest that MetaRibo-Seq correlates well with highly abundant protein levels in mixed  
227 bacterial communities, and that MetaRibo-Seq signal may thus serve as a surrogate for protein  
228 abundance in the study of complex bacterial communities.

229 MetaRibo-Seq signal characteristics and predictive power of protein abundance suggests  
230 that it may also prove useful in predicting proteins in taxonomically diverse fecal samples. As a  
231 preliminary demonstration of this, we predict small proteins using Prodigal<sup>38</sup> with decreased  
232 length cutoff (see Methods). We show a histogram of the number of small predictions (20-29  
233 amino acids) and the number of those predictions with MetaRibo-Seq RPKM greater than 0.5  
234 across samples (Figure S4A). Due to metaproteomic limitations, we are unable to validate these  
235 proteins directly. However, we can use a comparative genomic approach to identify clusters of  
236 small proteins, all with evidence of translation, that also possess evolutionary signatures  
237 indicative of coding regions. We cluster proteins at 70 percent amino acid identity (see  
238 Methods). We discover 21 clusters (with at least 4 members) of small proteins across Samples A,  
239 B, C, and D that contain both translational evidence among all members in the cluster and  
240 significant coding signatures determined via RNACode<sup>39</sup> (Figure S3B). We also show greater  
241 protein conservation among predictions with MetaRibo-Seq signal than by random chance  
242 (Figure S3D). Translational evidence of small proteins in diverse fecal samples decreases the  
243 number of predictions to a more conserved subset, suggesting it may be useful in gene  
244 prediction.

245



246 Consistent translational regulation is observed across samples and taxa.

247

248 By contrasting metatranscriptomics with MetaRibo-Seq, we identify translationally  
249 regulated genes in fecal samples. This provides a widespread view of genes that are consistently  
250 translationally regulated within these systems. For Samples A, B, C, and D individually, we  
251 show the number of gene predictions and significantly translationally regulated genes (Figure  
252 6A). We detect reasonable DESeq2 model fits in comparing between technologies, as shown by  
253 the dispersion plots for these analyses for each sample (Figure S4). These significantly  
254 translationally regulated genes are clustered at 70 percent amino acid identity for each sample  
255 (see Methods, Figure 6B). In a combined analysis (Figure 6C), we define any cluster containing  
256 five or more sequences as consistently translationally regulated. The representative sequences for  
257 all of these consistently translationally regulated clusters are assigned GO terms with Blast2GO<sup>40</sup>  
258 (see Methods). The top 10 most common biological process associated GO terms are displayed,  
259 with translation being the top hit (Figure 6D). These sequences and clusters are provided for  
260 reference (File S1). Across samples, we catalog 42,267 differentially translated genes and 607  
261 consistently translationally regulated gene clusters in these fecal samples, many of which are  
262 involved in expected processes, like translation.

263 Other approaches, albeit more biased to known gene annotations, are to rely on Prokka<sup>41</sup>  
264 annotations. We count the number of times a gene symbol appears as differentially translated  
265 (Figure S5) and input those that appear at least five times into a GO Analysis (see Methods,  
266 Figure S6). Translation remains the top hit. For Samples A, B, C, and D, we provide GO  
267 analysis results of differential genes for each sample individually (Table S2). As a more  
268 pathway-oriented analysis, we also determine overrepresentation of pathways among globally  
269 differentially translated enzymes based on EC numbers assigned by Prokka<sup>41</sup> (see Methods,  
270 Table S3). Amino acid biosynthesis is among the most consistent top hits across samples (Table  
271 S3). Thus several approaches lead to expected conclusions of pathways and processes that are  
272 translationally regulated.

273

274 **Discussion**

275

276           One of the major limitations in advancing the functional knowledge of microbial  
277 communities is an inability to measure the macromolecular output of a given community in an  
278 unbiased manner. For example, until now, we have been unable to study fecal bacterial  
279 communities, or any *in vivo* system of bacteria, at the level of protein synthesis. Previous  
280 approaches have required *in vitro* growth of large, purified cultures; this limits both throughput  
281 and the diversity of the sample that can be studied. Here, we introduce a new method, MetaRibo-  
282 Seq, and provide evidence that this method enables the human fecal microbiota to be studied at a  
283 translational level. In five taxonomically varied samples from human subjects with variable  
284 health status, we show MetaRibo-Seq signal retains the taxonomic diversity of the samples. The  
285 signal itself is as expected for a chloramphenicol-treated ribosome profiling library – including  
286 local enrichment within coding regions and greater enrichment across the start and stop codons  
287 of genes. This suggests we have a way to measure bacterial protein synthesis *in vivo* for the first  
288 time.

289           To conduct a fair comparison, we perform MetaRibo-Seq on diverse samples but also a  
290 lower diversity fecal sample (Sample E) so that more representative protein quantifications of  
291 select taxa are achievable. In taxonomically diverse stool samples, MetaRibo-Seq is comparably  
292 predictive to protein abundance as metatranscriptomics. However, we show it can be  
293 significantly more predictive in a lower diversity scenario. We show that the addition of lower  
294 abundant taxa weaken overall correlations in mixed communities. Biologically,  
295 metatranscriptomics and MetaRibo-Seq are snapshots of gene transcripts or proteins synthesized,  
296 respectively, not direct measurement of the proteins that currently exists. Moreover, significant  
297 post-translational differences between taxa likely exist. Technically, it becomes challenging to  
298 obtain accurate protein abundances for lowly abundant taxa and proteins in a sample, making  
299 such correlations to protein abundance themselves less representative. We conclude that while  
300 MetaRibo-Seq can outperform metatranscriptomics within a highly abundant organism, this  
301 effect is diminished, perhaps both for biological and technical reasons, when considering all taxa  
302 together in diverse communities.

303           There are several limitations to MetaRibo-Seq. First, MetaRibo-Seq does not include  
304 steps to degrade RNAs with secondary structure. This is a common issue for ribosome profiling  
305 protocols but exacerbated in this *de novo*, low input context<sup>10, 13</sup>. Though targeted approaches for  
306 specific bacteria have been successful for tRNA depletion,<sup>26</sup> an untargeted approach, which

307 would be necessary here, has yet to be implemented in literature. Utilization of sucrose density  
308 gradients instead of size-exclusion chromatography columns may also prove valuable in  
309 removing various structured RNAs; however, downstream ribosome profiling input requirements  
310 likely make this challenging to address. This limitation may, however, enable other types of  
311 investigation; for example, signal corresponding to structured RNAs will likely be useful to  
312 predict novel structured RNAs in non-coding regions. Experimental modifications will also  
313 likely improve these limitations.

314 We anticipate that MetaRibo-Seq will enable a clearer functional view of the fecal  
315 microbiota. With increasing use of metatranscriptomics, we envision that MetaRibo-Seq will be  
316 applied to various disease states to better probe the microbiota and its functions. We especially  
317 anticipate MetaRibo-Seq will be used longitudinally to study translational regulation of  
318 genomically-stable, clinically-relevant taxa. MetaRibo-Seq signal provides unique features like  
319 enrichment within coding regions, greater enrichment at the start and end of genes, and, as we  
320 show, some signs of codon-level resolution in some taxa. Future work will likely include using  
321 these features for gene prediction, which is particularly challenging when studying metagenomic  
322 samples and small proteins<sup>42</sup>. To validate such predictions, significant methods development and  
323 improvements in metaproteomics will be needed. With direct proteomic evidence often  
324 unattainable, coding potential, translational evidence, and conservation among predictions  
325 present themselves as the strongest lines of evidence proteins, especially small proteins, exists in  
326 the fecal microbiota (Figure S6 and File S2). We also expect MetaRibo-Seq to be applied to  
327 other culture-free conditions, perhaps requiring other modifications. Overall, we show that  
328 translation can be comprehensively studied in mixed bacterial communities in a culture-free  
329 manner. This method also sheds light on consistently translationally regulated genes *in vivo* in a  
330 comprehensive, metagenome-wide analysis.

331

## 332 **Materials and Methods**

333

### 334 **Subject Recruitment**

335 MetaRibo-Seq was performed on fecal samples from individuals from a variety of health  
336 states. Informed consent was obtained for all participants. None of the participants received  
337 bacterial translation inhibitors. All subjects were recruited at Stanford University as a part of one

338 of three IRB-approved protocols for tissue biobanking and clinical metadata collection (PIs: Dr.  
339 Ami Bhatt, Dr. Victor Henderson, Dr. David Miklos).

340

### 341 **Fecal Samples Storage**

342 Stool was immediately stored in 2 mL cryovials and frozen at -80 °C. Stool was not  
343 thawed until lysis. For RNA extraction applications, 1.3 grams of fecal samples were preserved  
344 in 700 µL of RNALater (Ambion) at -80 °C.

345

### 346 **Cell Lysis for Metatranscriptomics and MetaRibo-Seq**

347 Stool (150 mg) was suspended in 600 µL Qiagen RLT lysis buffer supplemented with  
348 one percent beta-mercaptoethanol and 0.3 U/µL Superase-In (Invitrogen). For MetaRibo-Seq  
349 lysis, 1.55 mM of chloramphenicol was also added to this lysis solution, and the solution was  
350 incubated at room temperature for 5 minutes. The suspension was subjected to bead beating for 3  
351 minutes using 1.0 mm Zirconia/Silica beads. This was performed with a MiniBeadBeater-16,  
352 Model 607. The lysed solution was centrifuged at room temperature for 3 minutes at 21,000 x g  
353 to pellet cellular debris, and the supernatant was extracted to 2 mL tubes.

354

### 355 **Metagenomics**

356 DNA was extracted from fecal samples with DNA Stool Mini Kit (Qiagen) using  
357 manufacture protocols. Samples were exposed to bead beating for 3 minutes. 1 ng of DNA was  
358 used to create Nextera XT libraries according to manufacturer's instructions (Illumina).

359

### 360 **MetaRibo-Seq**

361 The lysis supernatant was subjected to ethanol precipitation with 0.1 percent volume 3M  
362 sodium acetate and 2.5 volumes of 100 percent ethanol. To precipitate, samples were incubated  
363 at -80 °C for 30 minutes, then centrifuged at 21,000 x g for 30 minutes at 4 °C. This was a rough  
364 purification specifically implemented to enable suspension of concentrated RNA from  
365 reasonable input of fecal sample. The pellet of RNA and RNA-protein complexes was  
366 resuspended in MNase buffer. The buffer contained 25 mM Tris pH 8.0, 25 mM NH<sub>4</sub>Cl, 10 mM  
367 MgOAc, and 1.55 mM chloramphenicol. To resuspend, we quickly broke the pellet apart with a  
368 pipette tip and vortexed for 15 seconds. 1 µL of solution was diluted 20 fold and quantified with

369 Qubit dsDNA HS Assay Kit (Invitrogen). MNase reaction mix was prepared as described<sup>33</sup>,  
370 except this was scaled down to an input of 80 µg of RNA and 1 µL of NEB MNase 500 U/µL in  
371 a total reaction volume of 200 µL. The MNase reaction was incubated at room temperature for 2  
372 hours. All following steps were performed identically<sup>33</sup>, except the tRNA removal steps were  
373 excluded. Briefly, 500 µL of polysome binding buffer was used to wash the Sephacryl S400  
374 MicroSpin columns (GE Healthcare Life Sciences) three times - spinning the column for 3  
375 minutes at 4 °C at 600 RPM. Polysome binding buffer consisted of 100 µL Igepal CA-630, 500  
376 µL magnesium chloride at 1M, 500 µL EGTA at 0.5 M, 500 µL of NaCl at 5M, 500 µL Tris-HCl  
377 pH 8.0. at 1M, and 7.9 mL of RNase-free water. The MNase reaction was applied to the column  
378 and centrifuged for 5 minutes at 4 °C. The flow through was purified further with miRNAeasy  
379 Mini Kit (Qiagen) using manufacture protocols. Elution was performed at 15 µL volume. rRNA  
380 was depleted using RiboZero-rRNA Removal Kit for Bacteria (Illumina) using manufacture  
381 protocol, except all reaction volumes and amounts were reduced by 50 percent. This was purified  
382 with RNAeasy MinElute Cleanup Kit (Qiagen), eluting in 20 µL. The reaction, in 18 µL volume  
383 at a total of 100 ng, was subjected to T4 PNK Reaction (NEB M0201S) with addition of 1µL  
384 Superase-In (Invitrogen), 2.2 µL 10X T4 PNK Buffer, and 1 µL T4 PNK (10U/µL). This  
385 reaction was purified again with RNAeasy MinElute Cleanup (Qiagen). The concentration was  
386 determined with Qubit RNA HS Assay Kit (Illumina). With 100 ng as input, libraries were  
387 prepared using NEBNext Small RNA Library Prep Set for Illumina (NEB, E7330), using  
388 manufacture protocols. DNA was purified using Minelute PCR Purification Kit (Qiagen).

389

### 390 **Small Metatranscriptomics of Fecal Samples**

391 We performed metatranscriptomics as follows: 15 µL of proteinase K (Ambion, 20  
392 mg/mL) was added to 600 µL of lysate. After incubation for 10 minutes at room temperature,  
393 samples were centrifuged at 21,000 x g for 3 minutes and the supernatant was collected. An  
394 equal volume of Phenol/Chloroform/Isoamyl Alcohol 25:24:1 (pH. 5.2) was applied and vortex  
395 for three minutes. The mixture was centrifuged at 21,000 x g for three minutes. The aqueous  
396 phase was extracted. This was repeated once more. The final aqueous phase was ethanol  
397 precipitated. The RNA was further purified using the RNAeasy Mini plus Kit (Qiagen) using  
398 manufacture protocols. Any remaining DNA was degraded via Baseline-ZERO-Dnase  
399 (Epicentre) using manufacture protocols. RNA was fragmented for 15 minutes at 70 °C using

400 RNA Fragmentation Reagent (Ambion) using manufacture protocols. At this point, the  
401 MetaRibo-Seq and small metatranscriptomics protocol completely converge. The fragmented  
402 RNA was purified with miRNAeasy Mini Kit (Qiagen) using manufacture protocols. Elution was  
403 performed at 15  $\mu$ L. rRNA was depleted using RiboZero-rRNA Removal Kit for Bacteria  
404 (Illumina) using half reactions of manufacture protocol. This was purified with RNAeasy  
405 MinElute Cleanup Kit (Qiagen), eluting in 20  $\mu$ L. The fragments, in 18  $\mu$ L volume, were  
406 subjected to T4 PNK Reaction (NEB M0201S) with addition of 1  $\mu$ L Superase-In (Invitrogen),  
407 2.2  $\mu$ L 10X T4 PNK Buffer, and 1  $\mu$ L T4 PNK (10U/ $\mu$ L). This reaction was purified again with  
408 RNAeasy MinElute Cleanup (Qiagen). The concentration was determined with Qubit RNA HS  
409 Assay Kit (Invitrogen). With 100 ng as input, libraries were prepared using NEBNext Small  
410 RNA Library Prep Set for Illumina (NEB, E7330), using manufacture protocols. DNA was  
411 purified using MinElute PCR Purification Kit (Qiagen).

412

### 413 **Differential Centrifugation and FASP for Metaproteomics**

414 To remove human proteins, fecal samples were subjected to differential centrifugation.  
415 100 mg of fecal sample was suspended in 1x PBS in 1.7 mL Eppendorf tubes. The tubes were  
416 centrifuged at 600 x g for 1 minute at room temperature. The supernatant was collected in a clean  
417 Eppendorf tube and centrifuged at 10,000 x g for 1 minute at room temperature. The supernatant  
418 was decanted and the pellet was resuspended in 1 mL of PBS. The process was repeated once  
419 more. The final pellet was resuspended in 2% SDS, 100 mM DTT, and 20 mM Tris HCl, pH 8.8  
420 with protease inhibitor. These cells were subjected to bead beating for 3 minutes with a  
421 MiniBeadBeater-16, Model 607. 1mM zirconia/silica beads were used. Tubes were centrifuged  
422 for 3 minutes and clarified lysate in the supernatant was collected. Lysate was prepared using  
423 FASP<sup>43</sup> with the same minor modifications previously documented<sup>44</sup>. Every step involved a  
424 centrifugation step for 15 minutes at 14,000 x g. Samples were diluted tenfold in 8 M urea and  
425 loaded into Microcon Ultracel YM-30 filtration devices (Millipore). They were washed in 8 M  
426 urea, reduced for 30 minutes in 10 mM DTT, and alkylated in 50 mM iodoacetamide for 20  
427 minutes. Samples were washed three times in 8M urea and two times in 50 mM ammonium  
428 bicarbonate. Trypsin (Pierce 90057) (1:100 enzyme-to-protein ratio) was added and incubated  
429 overnight at 37 °C. Into a new collection tube, samples were centrifuged and further eluted in 50  
430  $\mu$ L of 70 percent acetonitrile and 1 percent formic acid. The mixture was brought to dryness for

431 one hour using a Savant SPD121P SpeedVac concentration at 30°C, then resuspended in 0.2  
432 percent formic acid<sup>44</sup>.

433

#### 434 **Metaproteomics**

435 LC-MS/MS analysis was performed by the Stanford University Mass Spectrometry  
436 Facility using the Thermo Orbitrap Fusion Tribrid. A Thermo Scientific Orbitrap Fusion coupled  
437 to a nanoAcquity UPLC system (Waters, M Class) was used to collect mass spectra (MS).  
438 Samples were loaded on a 25 cm sub 100 micron C18 reverse phase column packed in-house  
439 with a 80 minute gradient at a flow rate of 0.45 µL/min. The mobile phase consisted of: A (water  
440 containing 0.2% formic acid) and B (acetonitrile containing 0.2% formic acid). A linear gradient  
441 elution program was used: 0–45 min, 6–20 % (B); 45-60 min, 35 % (B); 60-70 min, 45 % (B);  
442 70-71 min, 70 % (B); 71-77 min, 95 % (B); 77-80 min, 2 % (B). Ions were generated using  
443 electrospray ionization in positive mode at 1.6 kV. MS/MS spectra were obtained using Collision  
444 Induced Fragmentation (CID) at a setting of 35 of arbitrary energy. Ions were selected for  
445 MS/MS in a data dependent, top 15 format with a 30 second exclusion time. Scan range was set  
446 to 400 – 1500 m/z. Typical orbitrap mass accuracy was below 2 ppm; for analysis. A 12 ppm  
447 window was allowed for precursor ions and 0.4 Da for the fragment ions for CID fragmentation  
448 detected in the ion trap. Prokka-predicted<sup>41</sup> proteins were used as a reference database for protein  
449 detection using the Byonic proteomics search pipeline v 2.10.5<sup>45</sup>. Byonic parameters include:  
450 spectrum-level FDR auto, digest cutter C-terminal cutter, peptide termini semi-specific,  
451 maximum number of missed cleavages 2, fragmentation type CID low energy, precursor  
452 tolerance 12.0 ppm, fragment tolerance 0.4 ppm, protein FDR cutoff 1 percent. These methods  
453 were performed by Stanford Mass Spectrometry Facility (SUMS). Using spectral count output,  
454 Normalized Spectral Abundance Factor (NSAF) was calculated by in house scripts.

455

#### 456 **De Novo Assembly**

457 Quality trimmed metagenomic reads were assembled using metaSPAdes 3.7.0<sup>47</sup>. For all  
458 samples, a maximum of 60 million metagenomic reads was used to generate assemblies. Samples  
459 sequenced to higher depth were randomly subsetted to 60 million for assembly purposes to both  
460 ensure relatively similar numbers of gene predictions and limit computational requirements in  
461 assembly and downstream predictions.

462

## 463 **Read Mapping, Gene Prediction and Annotation**

464 Reads were trimmed with trim galore version 0.4.0 using cutadapt 1.8.1<sup>46</sup> with flags `-q`  
465 `30` and `-illumina`. Reads were mapped to the annotated assembly using bowtie version 1.1.1<sup>48</sup>.  
466 To avoid all possible conservation conflicts in downstream differential analysis, only perfect,  
467 unique short read alignments were considered. IGV<sup>49</sup> was used to visualize coverage. Prokka  
468 v1.12<sup>41</sup> was used to predict genes from the metagenomics assemblies using the `-meta` option.  
469 Annotations were facilitated by many dependencies<sup>38,50,51,52</sup>. For small protein predictions,  
470 prodigal<sup>38</sup> was performed after lowering the size threshold from 90 bases to 60 bases.

471

## 472 **Read density as a function of position**

473 MetaRibo-seq reads were mapped to their metagenomic assemblies. The assembly and  
474 aligned reads were analyzed with RiboSeqR<sup>53</sup>. CDSs (coding sequences) were predicted using  
475 the findCDS function. Ribosome profiling counts for predicted CDSs were determined with the  
476 sliceCounts function. CDSs were filtered to contain at least 10 reads.

477

## 478 **Taxonomic Classification of Technologies**

479 Reads mapping specifically to Prokka-predicted<sup>41</sup> coding regions were counted. That  
480 entire genomic element was input into One Codex<sup>54</sup> for classification equal to the number of  
481 reads mapping to it. This enabled fair comparisons between technologies, as the small  
482 metatranscriptomics and MetaRibo-Seq reads can be too small to classify individually with *k*-  
483 mer-based approaches. Though metagenomic reads were long enough to be classified directly,  
484 they were also subject to the same analysis – entire genes are classified in equal number to the  
485 reads overlapping them. Thus, all taxonomy plots represent entire gene classifications and are  
486 dependent on the assembly.

487

## 488 **Differential Analysis**

489 The number of reads mapping to a given region were calculated with bedtools multicov<sup>59</sup>.  
490 Strandedness was enforced for metatranscriptomics and MetaRibo-Seq. All differential analyses  
491 were performed using these counts with all conditions performed in duplicate via DESeq2<sup>60</sup>. A  
492 gene was considered differential if it had log2fold change above 1 or below -1, while also



493 reaching an FDR < 0.05. Results were displayed as volcano plots or tables. Heatmaps were  
494 created using gplots<sup>61</sup>. Reads per Kilobase Million (RPKM) calculations were performed using  
495 in house scripts.

496

### 497 **Statistical Analysis**

498 All Pearson correlations were calculated in R using the Hmisc package<sup>55</sup>. Scatterplots  
499 were created with ggplot2<sup>56</sup>. Significance between Pearson correlations was assigned via cocor<sup>57</sup>.  
500 Significant differences between RPKM values were assigned using the Kruskal-Wallis test.  
501 Significance was assigned as \* p value < 0.05, \*\*\* p value < 0.001. Zou's<sup>58</sup> 95 percent  
502 confidence intervals were assigned \*\*\* if there is no overlap with 0 in the interval.

503

### 504 **Protein Clustering Analysis**

505 For analyses independent of gene annotation, significantly translationally regulated  
506 proteins were clustered using Cd-hit<sup>62</sup> with 70 percent amino acid identity. Representative  
507 sequences were input into Blast2GO<sup>40</sup> using the nr database. Small protein predictions with  
508 translational evidence were also clustered using this same approach. Coding potential was  
509 assessed using RNAcode<sup>39</sup> using the p value assigned to the predicted reading frame.

510

### 511 **Triplet Periodicity Analysis**

512 Using the same default parameters as read density as a function of position, triplet  
513 periodicity was called using RiboSeqR<sup>53</sup>. To analyze triplet periodicity of specific genera,  
514 assembled contigs were classified using One Codex<sup>54</sup>. Contigs that classified into a specific  
515 genus were binned together. Only reads mapping specifically to these bins were considered.

516

### 517 **GO Analysis**

518 Based on differential genes from DESeq2<sup>60</sup> analyses, UniProt<sup>63</sup> genes annotated by  
519 Prokka<sup>41</sup> were input into David Functional Annotation<sup>64,65</sup>. All species detected were used as  
520 background for these metagenomic analyses.

521

### 522 **Pathway Analysis**

523 Prokka<sup>41</sup> predicted genes with associated EC (enzyme) numbers were considered. For a  
524 given sample, all the reads mapping to any gene with a specific EC number were summed for  
525 metatranscriptomics and MetaRibo-Seq. DESeq2<sup>60</sup> called differential enzymes using  
526 MicrobiomeAnalyst<sup>66</sup>. Network mapping is performed to identify pathways corresponding to  
527 differential enzymes.

528

## 529 **Acknowledgements**

530 The authors would like to thank Tessa M Andermann, Ekaterina Tkachenko, and Joyce  
531 B. Kang for major contributions to the fecal biobank of bone marrow transplant patients at  
532 Stanford hospital. We would like to thank the patients and nurses involved in collection. We  
533 thank Christina Wyss-Coray for collecting Alzheimer's samples used in this study. We  
534 appreciate sample collection feedback from Victor Henderson and Tony Wyss-Coray. We thank  
535 Anshul Kundaje and Georgi Marinov for helpful computational analysis guidance. We would  
536 also like to thank Stanford University Mass Spectrometry for performing and analyzing mass  
537 spectrometry on the FASP fecal samples. Sequencing costs were supported via NIH S10 Shared  
538 Instrumentation Grant (1S10OD02014101) and Damon Runyon Clinical Investigator Award to  
539 ASB, Stanford ADRC grant # P50AG047366. B.J.F is supported by National Science  
540 Foundation Graduate Research Fellowship DGE-114747.

541

## 542 **Figure Legends**

543

### 544 **Figure 1**

545 Workflow of ribosome profiling.

546 (A) Experimental workflow of MetaRibo-Seq. Chloramphenicol halts translation, the bacterial  
547 community is lysed, MNase is used to create footprints, and footprints are converted to  
548 sequencing libraries.

549 (B) Computational workflow of the multi-omics approach. *De novo* assemblies are created and  
550 annotated, predicted genes are quantified at multi-omic levels, and taxonomy, correlations, and  
551 differential abundance are determined from these results.

552

### 553 **Figure 2**

554 MetaRibo-Seq signal captures diversity in a metagenomic context.

555 (A) Genus-level classifications of all sequencing technologies performed on Samples A, B, C, D,  
556 and E. Replicates for metatranscriptomics and MetaRibo-Seq are shown for reproducibility. Taxa  
557 represented below three percent are grouped into “Other” for visual purposes.

558 (B) Shannon diversities across technologies for these samples are displayed.

559

### 560 **Figure 3**

561 MetaRibo-Seq signal is characteristic of chloramphenicol-treated ribosome profiling in bacteria  
562 across diverse samples.

563 (A-D) Average MetaRibo-Seq signal across genes and flanking regions for Sample A, B, C, and  
564 D, respectively. Every predicted open reading frame containing at least 10 reads are included in  
565 the analysis.

566

### 567 **Figure 4**

568 In a low diversity fecal sample, MetaRibo-Seq is a significantly better predictor than  
569 metatranscriptomics of protein abundance and ATP synthase stoichiometry in *E. coli*.

570 (A) In Sample E, there are 1503 proteomically-detectable genes. Only focusing on these genes,  
571 we taxonomically classify the entire gene in equal number to the reads (for metatranscriptomics  
572 and MetaRibo-Seq) or spectral counts (for metaproteomics) assigned to it (see Methods).

573 (B) Scatterplot of MetaRibo-Seq RPKM and metaproteomics NSAF log-scaled for these 1503  
574 genes.

575 (C) Scatterplot of MetaRibo-Seq RPKM and metaproteomics NSAF log-scaled only for the 928  
576 proteomically-detected genes predicted from isolate *E. coli*.

577 (D) Pearson correlations for pairwise comparisons across technologies. Blue bars indicate  
578 Pearson correlations pertaining to the entire metagenomic Sample E. The correlations between  
579 metatranscriptomics vs. MetaRibo-Seq, metatranscriptomics vs. metaproteomics, and MetaRibo-  
580 Seq vs. metaproteomics are 0.85, 0.39, and 0.46, respectively. All are significant ( $p$  value  $< 2^{-16}$ ).  
581 MetaRibo-Seq is a significantly better predictor of protein levels with Zou’s<sup>58</sup> 95 % confidence  
582 interval between -0.0917 to -0.0487. Red bars indicate Pearson correlations pertaining to the  
583 isolated *E. coli* in the sample. The correlations between metatranscriptomics vs. MetaRibo-Seq,  
584 metatranscriptomics vs. metaproteomics, and MetaRibo-Seq vs. metaproteomics are 0.90, 0.53,

585 and 0.64, respectively. All are significant ( $p$  value  $< 2^{-16}$ ). MetaRibo-Seq is a significantly better  
586 predictor of protein levels with Zou's<sup>58</sup> 95 % confidence interval between -0.1352 to -0.0868.

587 (E) F0F1 ATP synthase in *E. coli* forms with a specific stoichiometry as visualized.

588 (F) Correlation between log-scaled metatranscriptomics RPKM and expected ATP synthase  
589 stoichiometry in complex. The Pearson correlation is 0.56 ( $p$  value = 0.1475)

590 (G) Correlation between log-scaled MetaRibo-Seq RPKM and expected ATP synthase  
591 stoichiometry in complex. The Pearson correlation is 0.92 ( $p$  value = 0.0012).

592

### 593 **Figure 5**

594 MetaRibo-Seq signal significantly correlates to metaproteomics and is enriched for these  
595 products

596 (A) For Sample A, scatterplot of MetaRibo-Seq RPKM (Reads per Kilobase Million) and  
597 metaproteomics NSAF (Normalized Spectral Abundance Factor) both log10-scaled. 497 genes  
598 are displayed.

599 (B) Pairwise Pearson correlations between log-scaled metatranscriptomics RPKM, MetaRibo-  
600 Seq RPKM, and metaproteomics NSAF for these 497 genes. Pearson correlations are 0.88, 0.26,  
601 and 0.32 for metatranscriptomics vs. MetaRibo-Seq, metatranscriptomics vs. metaproteomics,  
602 and MetaRibo-Seq vs. metaproteomics, respectively. All are significant ( $p$  value  $< 2^{-16}$ ).

603 MetaRibo-Seq is a significantly better predictor of protein levels than metatranscriptomics for  
604 these proteins in Sample A with a Zou's<sup>58</sup> 95 % confidence interval between -0.1322 and -  
605 0.0480.

606 (C) Metatranscriptomics and MetaRibo-Seq RPKM for all predicted genes compared to those  
607 detected by metaproteomics. Both metatranscriptomic and MetaRibo-Seq signal for  
608 proteomically-detected proteins are significantly enriched ( $p$  value  $< 2^{-16}$ ).

609 (D) For Sample B, scatterplot of MetaRibo-Seq RPKM and metaproteomics NSAF both log10-  
610 scaled. 497 genes are displayed.

611 (E) Pairwise Pearson correlations between log-scaled metatranscriptomics RPKM, MetaRibo-  
612 Seq RPKM, and metaproteomics NSAF for these 480 genes. Pearson correlations are 0.89, 0.36,  
613 and 0.34 for metatranscriptomics vs. MetaRibo-Seq, metatranscriptomics vs. metaproteomics,  
614 and MetaRibo-Seq vs. metaproteomics, respectively. All are significant ( $p$  value  $< 2^{-16}$ ).

615 (F) Metatranscriptomics and MetaRibo-Seq RPKM for all predicted genes compared to those  
616 detected by metaproteomics. Both metatranscriptomic and MetaRibo-Seq signal for  
617 proteomically-detected proteins are significantly enriched ( $p$  value  $< 2^{-16}$ ).

618

### 619 **Figure 6**

620 Genes that are consistently translationally regulated emerged across samples and taxa.

621 (A) For Samples, A, B, C, and D, we show the number of total gene predictions via Prokka<sup>41</sup>. We  
622 performed DESeq2<sup>60</sup> on these individually, comparing metatranscriptomics to MetaRibo-Seq.

623 We show the number of those genes identified as translationally (absolute value(log<sub>2</sub> fold  
624 change)  $> 1$  and FDR  $< 0.05$ ). We predict 223630, 196683, 272895, and 173624 genes from  
625 Sample A, B, C, and D, respectively. Among these, 11872, 6580, 15188, and 8647, respectively,  
626 are called significant translationally regulated genes.

627 (B) Significant translationally regulated genes are converted to proteins and clustered at 70  
628 percent amino acid identity (see Methods). The number of clusters with specific numbers of  
629 sequences are displayed, jittered and color-coded for each sample.

630 (C) The number of clusters with specific numbers of sequences combined across Samples A, B,  
631 C, and D

632 (D) If the combined cluster contained at least 5 sequences, this gene is considered consistently  
633 translationally regulated. 607 clusters met this requirement. For these clusters, the representative  
634 sequence (see Methods) is selected to represent the entire cluster. These representatives were  
635 input into Blast2GO to assign GO terms based on protein sequence.

636

### 637 **Figure S1**

638 MetaRibo-Seq demonstrates some weak signs of overall codon-resolution.

639 (A-D) Triplet periodicity across footprint lengths for Sample A, B, C, and D, respectively.

640 Colors indicate which frame a read falls within.

641

### 642 **Figure S2**

643 MetaRibo-Seq demonstrates stronger codon resolution in taxa-specific analyses.

644 (A) All contigs assigned to the genera Bacteroides are considered from Sample A and B,  
645 respectively. Only these contigs are considered in triplet periodicity analyses.

646 (B and C) The same triplet periodicity analysis for Faecalibacterium and Alistipes, respectively.

647

### 648 **Figure S3**

649 Small protein predictions with translational evidence demonstrate strong conservation.

650 (A) Breakdown of small protein predictions across Samples A, B, C, and D, and those with  
651 translational evidence (MetaRibo-Seq signal above 0.5 RPKM).

652 (B) Genus-level classification of small protein predictions across Samples A, B, C, and D.

653 Relative proportions of small proteins including all predictions and only those with translational  
654 evidence are provided.

655 (C) The 6,774 small proteins with translational evidence are clustered at 70 percent amino acid  
656 identity. 47 clusters with at least 4 members are identified. Among these, 21 clusters possess  
657 evolutionary signatures indicative of coding regions (p values < 0.001) via RNACode<sup>39</sup>.

658 (D) In dark red, clustering with 70 percent protein identity of small proteins with translational  
659 evidence – 6,774 proteins across all samples. In orange, clustering with 70 percent amino acid  
660 identity of 6,744 small proteins randomly chosen from prodigal predictions; an equal number of  
661 proteins as those with translational evidence from each sample were randomly chosen.

662

### 663 **Figure S4**

664 DESeq2 models adequately fit dispersion in comparing metatranscriptomics to MetaRibo-Seq.

665 (A-D) Dispersion plots of DESeq2 models fit to Samples A, B, C, and D, respectively.

666

### 667 **Figure S5**

668 Numerous genes are consistently translationally regulated in the fecal microbiota

669 (A) For Samples A, B, C and D, we show genera level classifications of translationally regulated  
670 genes assigned UniProt<sup>31</sup> protein IDs.

671 (B-E) Volcano plots comparing metatranscriptomics and MetaRibo-Seq in Sample A, B, C, and  
672 D, respectively. Significant genes are colored in red. The four most consistently translationally  
673 regulated genes are also denoted.

674

### 675 **Figure S6**

676 In depth analysis of consistently translationally regulated genes with assigned names in the fecal  
677 microbiota across Samples A, B, C, and D.

678 (A) Top 40 most common translationally regulated genes across samples. Heatmap intensity  
679 represents the number of times the gene appeared differential in a sample.

680 (B) GO analysis including genes that are differentially translated at least 5 times across samples.

681

#### 682 **Table S1**

683 Mapping statistics to *de novo* references. This table shows the number of reads, percentage of  
684 reads mapping to the assembly, and percentage of reads overlapping regions annotated as coding.

685

#### 686 **Table S2**

687 GO analysis of significant translationally regulated genes for Samples A, B, C, and D. Only  
688 genes assigned UniProt<sup>63</sup> protein IDs are considered. Significant IDs are called with DESeq2<sup>60</sup>.  
689 These are input into David<sup>64</sup>.

690

#### 691 **Table S3**

692 Pairwise comparison of metatranscriptomics to MetaRibo-Seq across Sample A, B, C, and D.  
693 Only predicted genes with EC numbers are considered. Significant differences in EC numbers  
694 are called with DESeq2<sup>60</sup>. Negative log<sub>2</sub>FC means lower in the technology first listed in the tab  
695 under consideration. EC numbers and their associated adjusted p value are input into  
696 MicrobiomeAnalyst<sup>66</sup> to determine overrepresented pathways based on differential EC numbers.

697

#### 698 **Table S4**

699 We display all correlations between replicates and technologies for Samples A, B, C, and D. For  
700 each sample, we provide correlations between metatranscriptomics replicates, MetaRibo-Seq  
701 replicates, metagenomics versus metatranscriptomics, metagenomics versus MetaRibo-Seq,  
702 metatranscriptomics versus MetaRibo-Seq, and metagenomics versus translation efficiency (TE  
703 – ratio of MetaRibo-Seq and metatranscriptomics).

704

#### 705 **File S1**

706 We provide sequences for every protein in Samples A, B, C, and D that are translationally  
707 regulated in the gut microbiota. Translationally regulated proteins (.faa) and 70 percent identity  
708 clustering (.clstr) are provided for Samples A, B, C, and D. The representative sequences for  
709 clusters (.faa) with more than 5 sequences for samples are also provided. The sequence name  
710 itself denotes which sample the sequence is found in. Any sequence that begins with a specific  
711 identifier can be linked to a sample: HDALDHFB = Sample A, HENMDNCI =Sample B,  
712 PJJNKMKO = Sample C, GPBGMPE = Sample D. Blast2GO<sup>40</sup> results for the representative  
713 sequences of consistent clusters are provided.

714

## 715 **File S2**

716 We contribute sequences of small proteins we identified. Small protein predictions using  
717 prodigal<sup>38</sup> with lower size threshold (60 bp) for Samples A, B, C, and D individually (.faa) are  
718 provided. Small protein predictions with MetaRibo-Seq RPKM above 0.5 for the four samples  
719 individually (.faa) are given. Combined clustering of these small proteins with translational  
720 evidence are provided (.clstr). Those translated clusters with more than 3 sequences and with  
721 RNACode p values < 0.001 are provided in the “smallproteinsequences” folder named by the  
722 cluster they belong to.

723

## 724 **Bibliography**

725

- 726 1. Klassen, J. L. Defining microbiome function. *Nat. Microbiol.* **3**, 864–869 (2018).
- 727 2. Petriz, B. A. & Franco, O. L. Metaproteomics as a Complementary Approach to Gut  
728 Microbiota in Health and Disease. *Front. Chem.* **5**, 4 (2017).
- 729 3. Wilmes, P., Heintz-Buschart, A. & Bond, P. L. A decade of metaproteomics: Where we  
730 stand and what the future holds. *Proteomics* **15**, 3409–3417 (2015).
- 731 4. Lichtman, J. S., Sonnenburg, J. L. & Elias, J. E. Monitoring host responses to the gut  
732 microbiota. *ISME J.* **9**, 1908–1915 (2015).



- 733 5. Hyatt, D., LoCascio, P. F., Hauser, L. J. & Uberbacher, E. C. Gene and translation initiation  
734 site prediction in metagenomic sequences. *Bioinforma. Oxf. Engl.* **28**, 2223–2230 (2012).
- 735 6. Franzosa, E. A. *et al.* Relating the metatranscriptome and metagenome of the human gut.  
736 *Proc. Natl. Acad. Sci.* **111**, E2329–E2338 (2014).
- 737 7. Mehta, R. S. *et al.* Stability of the human faecal microbiome in a cohort of adult men. *Nat.*  
738 *Microbiol.* **3**, 347–355 (2018).
- 739 8. Schirmer, M. *et al.* Dynamics of metatranscription in the inflammatory bowel disease gut  
740 microbiome. *Nat. Microbiol.* **3**, 337–346 (2018).
- 741 9. Metatranscriptome of human faecal microbial communities in a cohort of adult men | Nature  
742 Microbiology. Available at: <https://www.nature.com/articles/s41564-017-0084-4>. (Accessed:  
743 17th April 2018)
- 744 10. Ingolia, N. T., Ghaemmaghami, S., Newman, J. R. S. & Weissman, J. S. Genome-wide  
745 analysis in vivo of translation with nucleotide resolution using ribosome profiling. *Science*  
746 **324**, 218–223 (2009).
- 747 11. Ingolia, N. T. Ribosome Footprint Profiling of Translation throughout the Genome. *Cell* **165**,  
748 22–33 (2016).
- 749 12. Cenik, C. *et al.* Integrative analysis of RNA, translation, and protein levels reveals distinct  
750 regulatory variation across humans. *Genome Res.* **25**, 1610–1621 (2015).
- 751 13. Li, G.-W., Burkhardt, D., Gross, C. & Weissman, J. S. Quantifying absolute protein  
752 synthesis rates reveals principles underlying allocation of cellular resources. *Cell* **157**, 624–  
753 635 (2014).

- 754 14. Mohammad, F., Woolstenhulme, C. J., Green, R. & Buskirk, A. R. Clarifying the  
755 Translational Pausing Landscape in Bacteria by Ribosome Profiling. *Cell Rep.* **14**, 686–694  
756 (2016).
- 757 15. Li, G.-W., Oh, E. & Weissman, J. S. The anti-Shine-Dalgarno sequence drives translational  
758 pausing and codon choice in bacteria. *Nature* **484**, 538–541 (2012).
- 759 16. Woolstenhulme, C. J., Guydosh, N. R., Green, R. & Buskirk, A. R. High-Precision Analysis  
760 of Translational Pausing by Ribosome Profiling in Bacteria Lacking EFP. *Cell Rep.* **11**, 13–  
761 21 (2015).
- 762 17. Lalanne, J.-B. *et al.* Evolutionary Convergence of Pathway-Specific Enzyme Expression  
763 Stoichiometry. *Cell* **173**, 749-761.e38 (2018).
- 764 18. Meyer, M. M. The role of mRNA structure in bacterial translational regulation. *Wiley*  
765 *Interdiscip. Rev. RNA* **8**, (2017).
- 766 19. Zengel, J. M. & Lindahl, L. Diverse Mechanisms for Regulating Ribosomal Protein  
767 Synthesis in Escherichia coli. in *Progress in Nucleic Acid Research and Molecular Biology*  
768 (eds. Cohn, W. E. & Moldave, K.) **47**, 331–370 (Academic Press, 1994).
- 769 20. Lindahl, L., Jaskunas, S. R., Dennis, P. P. & Nomura, M. Cluster of genes in Escherichia coli  
770 for ribosomal proteins, ribosomal RNA, and RNA polymerase subunits. *Proc. Natl. Acad.*  
771 *Sci.* **72**, 2743–2747 (1975).
- 772 21. Fallon, A. M., Jinks, C. S., Strycharz, G. D. & Nomura, M. Regulation of ribosomal protein  
773 synthesis in Escherichia coli by selective mRNA inactivation. *Proc. Natl. Acad. Sci.* **76**,  
774 3411–3415 (1979).
- 775 22. Dean, D. & Nomura, M. Feedback regulation of ribosomal protein gene expression in  
776 Escherichia coli. *Proc. Natl. Acad. Sci.* **77**, 3590–3594 (1980).

- 777 23. Bucca, G. *et al.* Translational control plays an important role in the adaptive heat-shock  
778 response of *Streptomyces coelicolor*. *Nucleic Acids Res.* **46**, 5692–5703 (2018).
- 779 24. Sawyer, E. B., Grabowska, A. D. & Cortes, T. Translational regulation in mycobacteria and  
780 its implications for pathogenicity. *Nucleic Acids Res.* doi:10.1093/nar/gky574
- 781 25. C. Taylor, R. *et al.* Changes in translational efficiency is a dominant regulatory mechanism  
782 in the environmental response of bacteria. *Integr. Biol.* **5**, 1393–1406 (2013).
- 783 26. Morita, Y., Gilmour, C., Metcalf, D. & Poole, K. Translational Control of the Antibiotic  
784 Inducibility of the PA5471 Gene Required for mexXY Multidrug Efflux Gene Expression in  
785 *Pseudomonas aeruginosa*. *J. Bacteriol.* **191**, 4966–4975 (2009).
- 786 27. Starosta, A. L., Lassak, J., Jung, K. & Wilson, D. N. The bacterial translation stress response.  
787 *FEMS Microbiol. Rev.* **38**, 1172–1201 (2014).
- 788 28. Jeong, Y. *et al.* The dynamic transcriptional and translational landscape of the model  
789 antibiotic producer *Streptomyces coelicolor* A3(2). *Nat. Commun.* **7**, 11605 (2016).
- 790 29. Mathieu, A. *et al.* Discovery and Function of a General Core Hormetic Stress Response in *E.*  
791 *coli* Induced by Sublethal Concentrations of Antibiotics. *Cell Rep.* **17**, 46–57 (2016).
- 792 30. Bullwinkle, T. J. & Ibba, M. Translation quality control is critical for bacterial responses to  
793 amino acid stress. *Proc. Natl. Acad. Sci.* **113**, 2252–2257 (2016).
- 794 31. Oh, E. *et al.* Selective Ribosome Profiling Reveals the Cotranslational Chaperone Action of  
795 Trigger Factor In Vivo. *Cell* **147**, 1295–1308 (2011).
- 796 32. Reck, M. *et al.* Stool metatranscriptomics: A technical guideline for mRNA stabilisation and  
797 isolation. *BMC Genomics* **16**, 494 (2015).
- 798 33. Latif, H. *et al.* A streamlined ribosome profiling protocol for the characterization of  
799 microorganisms. *BioTechniques* **58**, 329–332 (2015).

- 800 34. Bag, S. *et al.* An Improved Method for High Quality Metagenomics DNA Extraction from  
801 Human and Environmental Samples. *Sci. Rep.* **6**, 26775 (2016).
- 802 35. Conditions for ethanol precipitation of active 50 S ribosomal subunits from *Escherichia coli* -  
803 ScienceDirect. Available at:  
804 <https://www.sciencedirect.com/science/article/pii/S09266410171372>. (Accessed: 15th April  
805 2018)
- 806 36. Tamburini, F. B. *et al.* Precision Identification of Diverse Bloodstream Pathogens from the  
807 Gut Microbiome. *bioRxiv* 310441 (2018). doi:10.1101/310441
- 808 37. Maier, T., Güell, M. & Serrano, L. Correlation of mRNA and protein in complex biological  
809 samples. *FEBS Lett.* **583**, 3966–3973 (2009).
- 810 38. Hyatt, D. *et al.* Prodigal: prokaryotic gene recognition and translation initiation site  
811 identification. *BMC Bioinformatics* **11**, 119 (2010).
- 812 39. Washietl, S. *et al.* RNACode: Robust discrimination of coding and noncoding regions in  
813 comparative sequence data. *RNA* **17**, 578–594 (2011).
- 814 40. Götz, S. *et al.* High-throughput functional annotation and data mining with the Blast2GO  
815 suite. *Nucleic Acids Res.* **36**, 3420–3435 (2008).
- 816 41. Seemann, T. Prokka: rapid prokaryotic genome annotation. *Bioinforma. Oxf. Engl.* **30**, 2068–  
817 2069 (2014).
- 818 42. Ndah, E. *et al.* REPARATION: Ribosome Profiling Assisted (Re-)Annotation of Bacterial  
819 genomes. *bioRxiv* 113530 (2017). doi:10.1101/113530
- 820 43. Wiśniewski, J. R., Zougman, A., Nagaraj, N. & Mann, M. Universal sample preparation  
821 method for proteome analysis. *Nat. Methods* **6**, 359–362 (2009).

- 822 44. Tanca, A. *et al.* A straightforward and efficient analytical pipeline for metaproteome  
823 characterization. *Microbiome* **2**, 49 (2014).
- 824 45. Bern, M., Kil, Y. J. & Becker, C. Byonic: Advanced Peptide and Protein Identification  
825 Software. *Curr. Protoc. Bioinforma. Ed. Board Andreas Baxevanis Al* **CHAPTER**,  
826 Unit13.20 (2012).
- 827 46. Nurk, S. *et al.* Assembling Genomes and Mini-metagenomes from Highly Chimeric Reads.  
828 in *Research in Computational Molecular Biology* 158–170 (Springer, Berlin, Heidelberg,  
829 2013). doi:10.1007/978-3-642-37195-0\_13
- 830 47. Martin, M. Cutadapt removes adapter sequences from high-throughput sequencing reads.  
831 *EMBnet.journal* **17**, 10–12 (2011).
- 832 48. Langmead, B., Trapnell, C., Pop, M. & Salzberg, S. L. Ultrafast and memory-efficient  
833 alignment of short DNA sequences to the human genome. *Genome Biol.* **10**, R25 (2009).
- 834 49. Robinson, J. T. *et al.* Integrative genomics viewer. *Nat. Biotechnol.* **29**, 24–26 (2011).
- 835 50. Madden, T. *The BLAST Sequence Analysis Tool*. (National Center for Biotechnology  
836 Information (US), 2003).
- 837 51. Laslett, D. & Canback, B. ARAGORN, a program to detect tRNA genes and tmRNA genes  
838 in nucleotide sequences. *Nucleic Acids Res.* **32**, 11–16 (2004).
- 839 52. Finn, R. D., Clements, J. & Eddy, S. R. HMMER web server: interactive sequence similarity  
840 searching. *Nucleic Acids Res.* **39**, W29–W37 (2011).
- 841 53. riboSeqR. *Bioconductor* Available at: <http://bioconductor.org/packages/riboSeqR/>.  
842 (Accessed: 28th February 2017)
- 843 54. Minot, S. S., Krumm, N. & Greenfield, N. B. One Codex: A Sensitive and Accurate Data  
844 Platform for Genomic Microbial Identification. *bioRxiv* 027607 (2015). doi:10.1101/027607

- 845 55. Quinlan, A. R. & Hall, I. M. BEDTools: a flexible suite of utilities for comparing genomic  
846 features. *Bioinforma. Oxf. Engl.* **26**, 841–842 (2010).
- 847 56. Love, M. I., Huber, W. & Anders, S. Moderated estimation of fold change and dispersion for  
848 RNA-seq data with DESeq2. *Genome Biol.* **15**, 550 (2014).
- 849 57. Warnes, G. R. *et al.* *gplots: Various R Programming Tools for Plotting Data.* (2016).
- 850 58. Jr, F. E. H. & others, with contributions from C. D. and many. *Hmisc: Harrell*  
851 *Miscellaneous.* (2018).
- 852 59. Wickham, H., Chang, W. & RStudio. *ggplot2: Create Elegant Data Visualisations Using the*  
853 *Grammar of Graphics.* (2016).
- 854 60. Diedenhofen, B. *cocor: Comparing Correlations.* (2016).
- 855 61. Zou, G. Y. Toward using confidence intervals to compare correlations. *Psychol. Methods* **12**,  
856 399–413 (2007).
- 857 62. Li, W. & Godzik, A. Cd-hit: a fast program for clustering and comparing large sets of protein  
858 or nucleotide sequences. *Bioinformatics* **22**, 1658–1659 (2006).
- 859 63. Bateman, A. *et al.* UniProt: the universal protein knowledgebase. *Nucleic Acids Res.* **45**,  
860 D158–D169 (2017).
- 861 64. Huang, D. W., Sherman, B. T. & Lempicki, R. A. Systematic and integrative analysis of  
862 large gene lists using DAVID bioinformatics resources. *Nat. Protoc.* **4**, 44–57 (2009).
- 863 65. Huang, D. W., Sherman, B. T. & Lempicki, R. A. Bioinformatics enrichment tools: paths  
864 toward the comprehensive functional analysis of large gene lists. *Nucleic Acids Res.* **37**, 1–13  
865 (2009).

866 66. Dhariwal, A. *et al.* MicrobiomeAnalyst: a web-based tool for comprehensive statistical,  
867 visual and meta-analysis of microbiome data. *Nucleic Acids Res.* (2017).

868 doi:10.1093/nar/gkx295

869

Figure 1

A

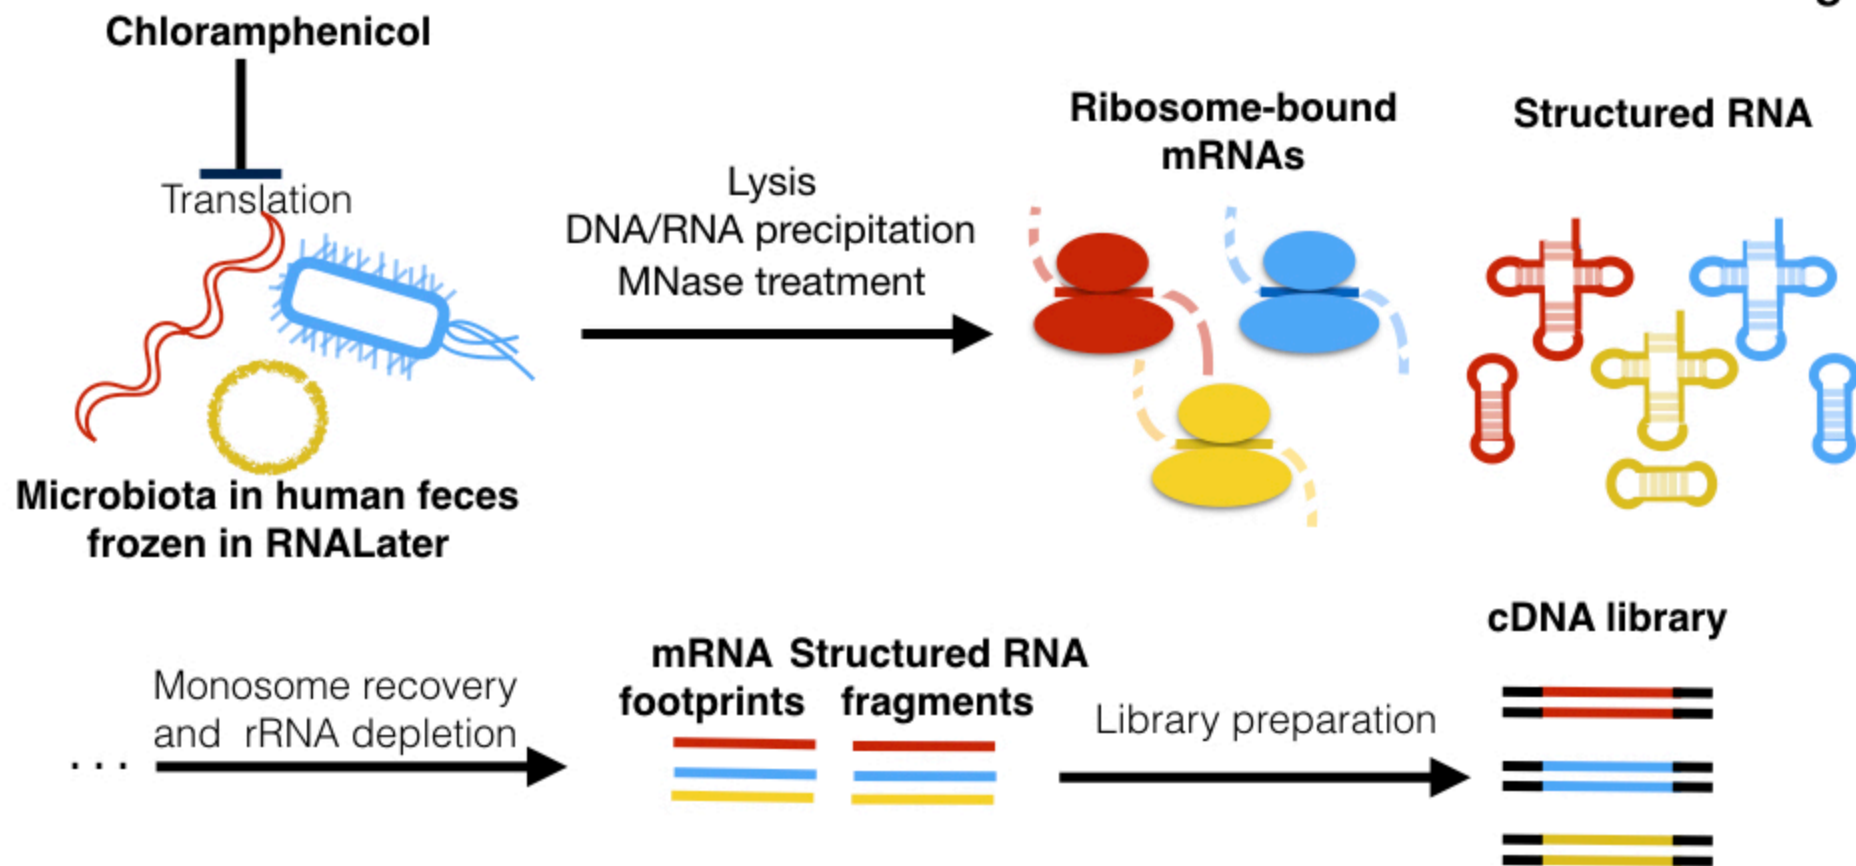

B

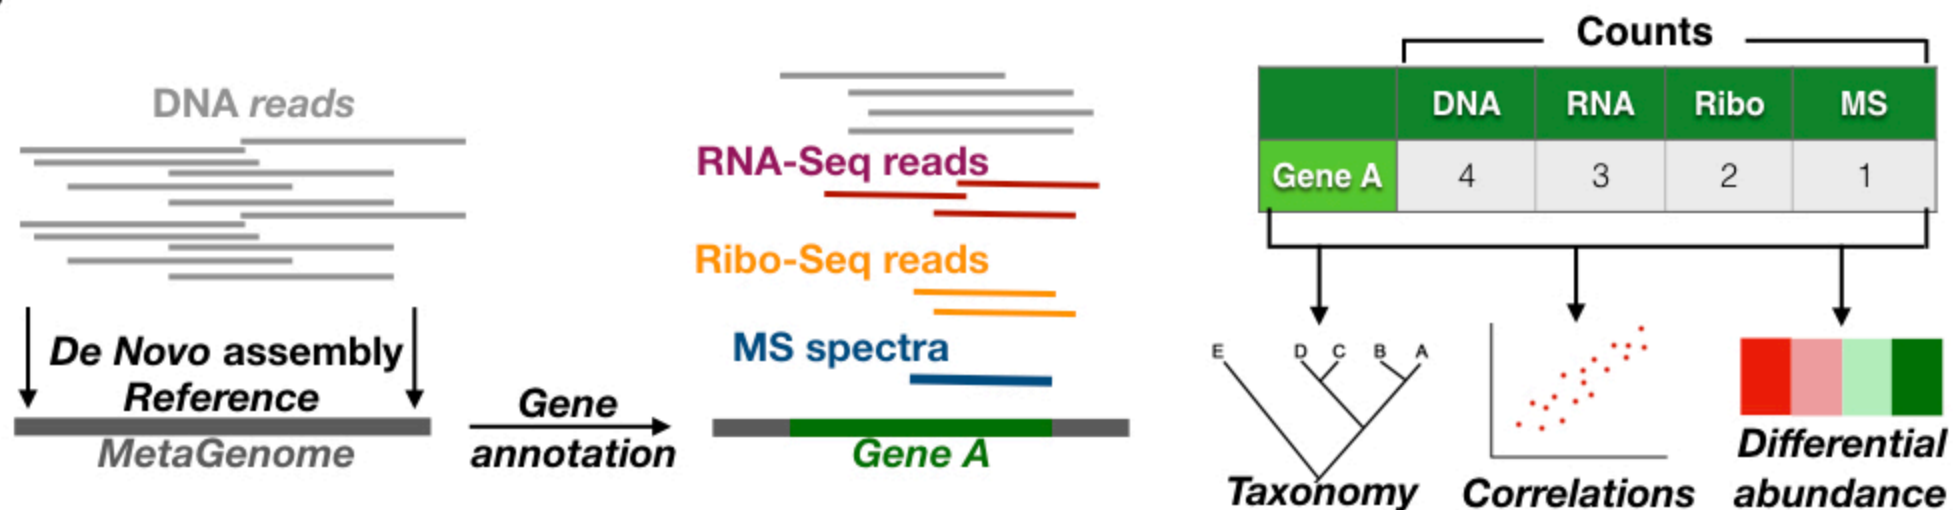



Figure 2

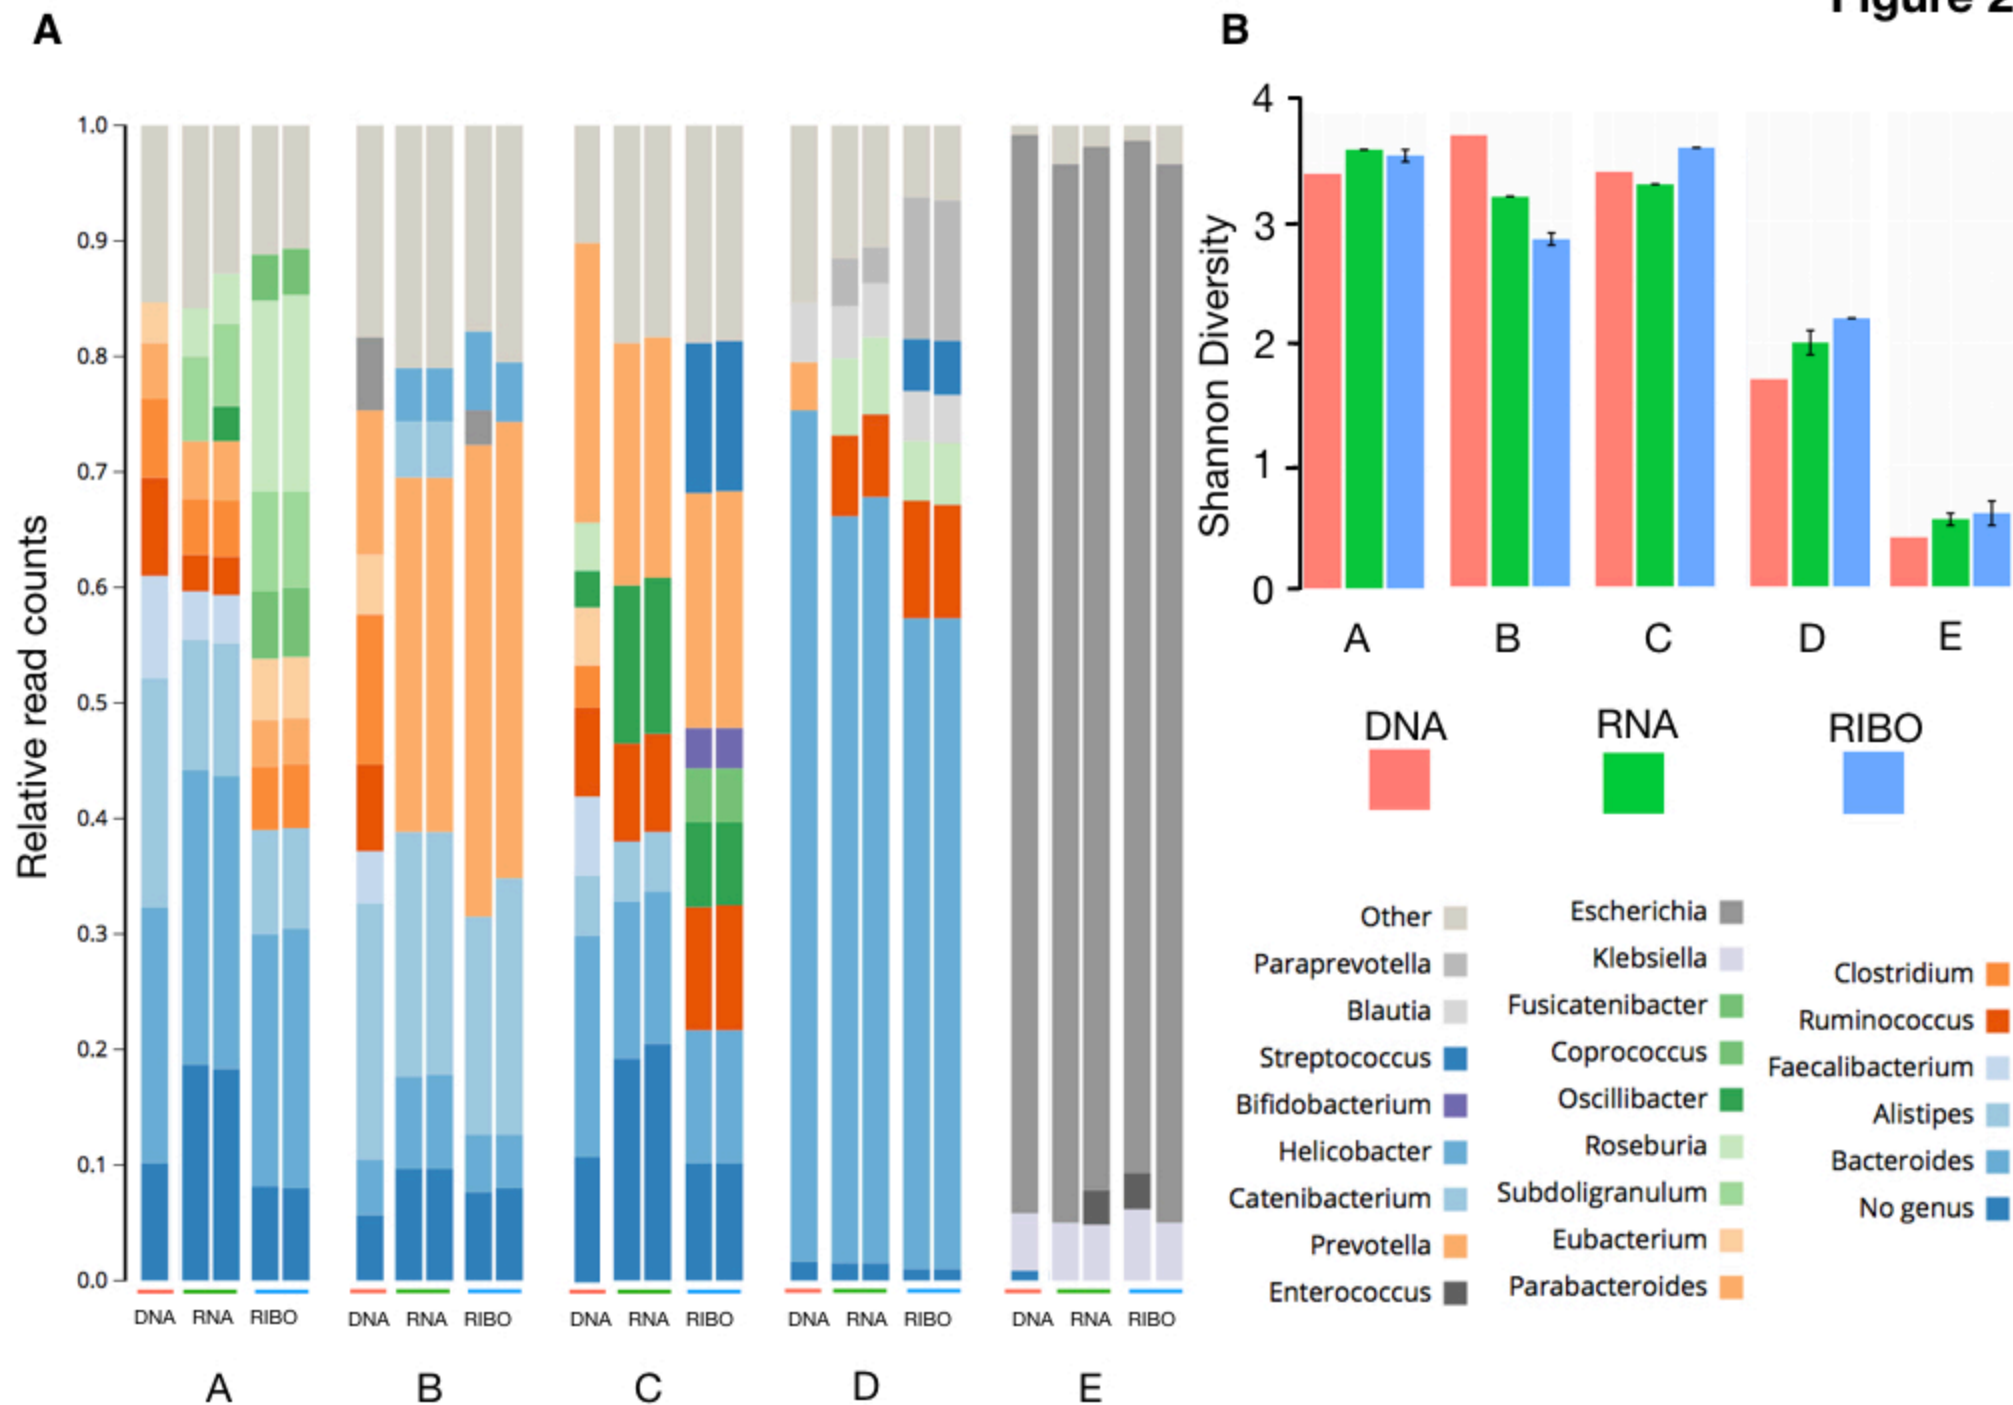

**Figure 3**

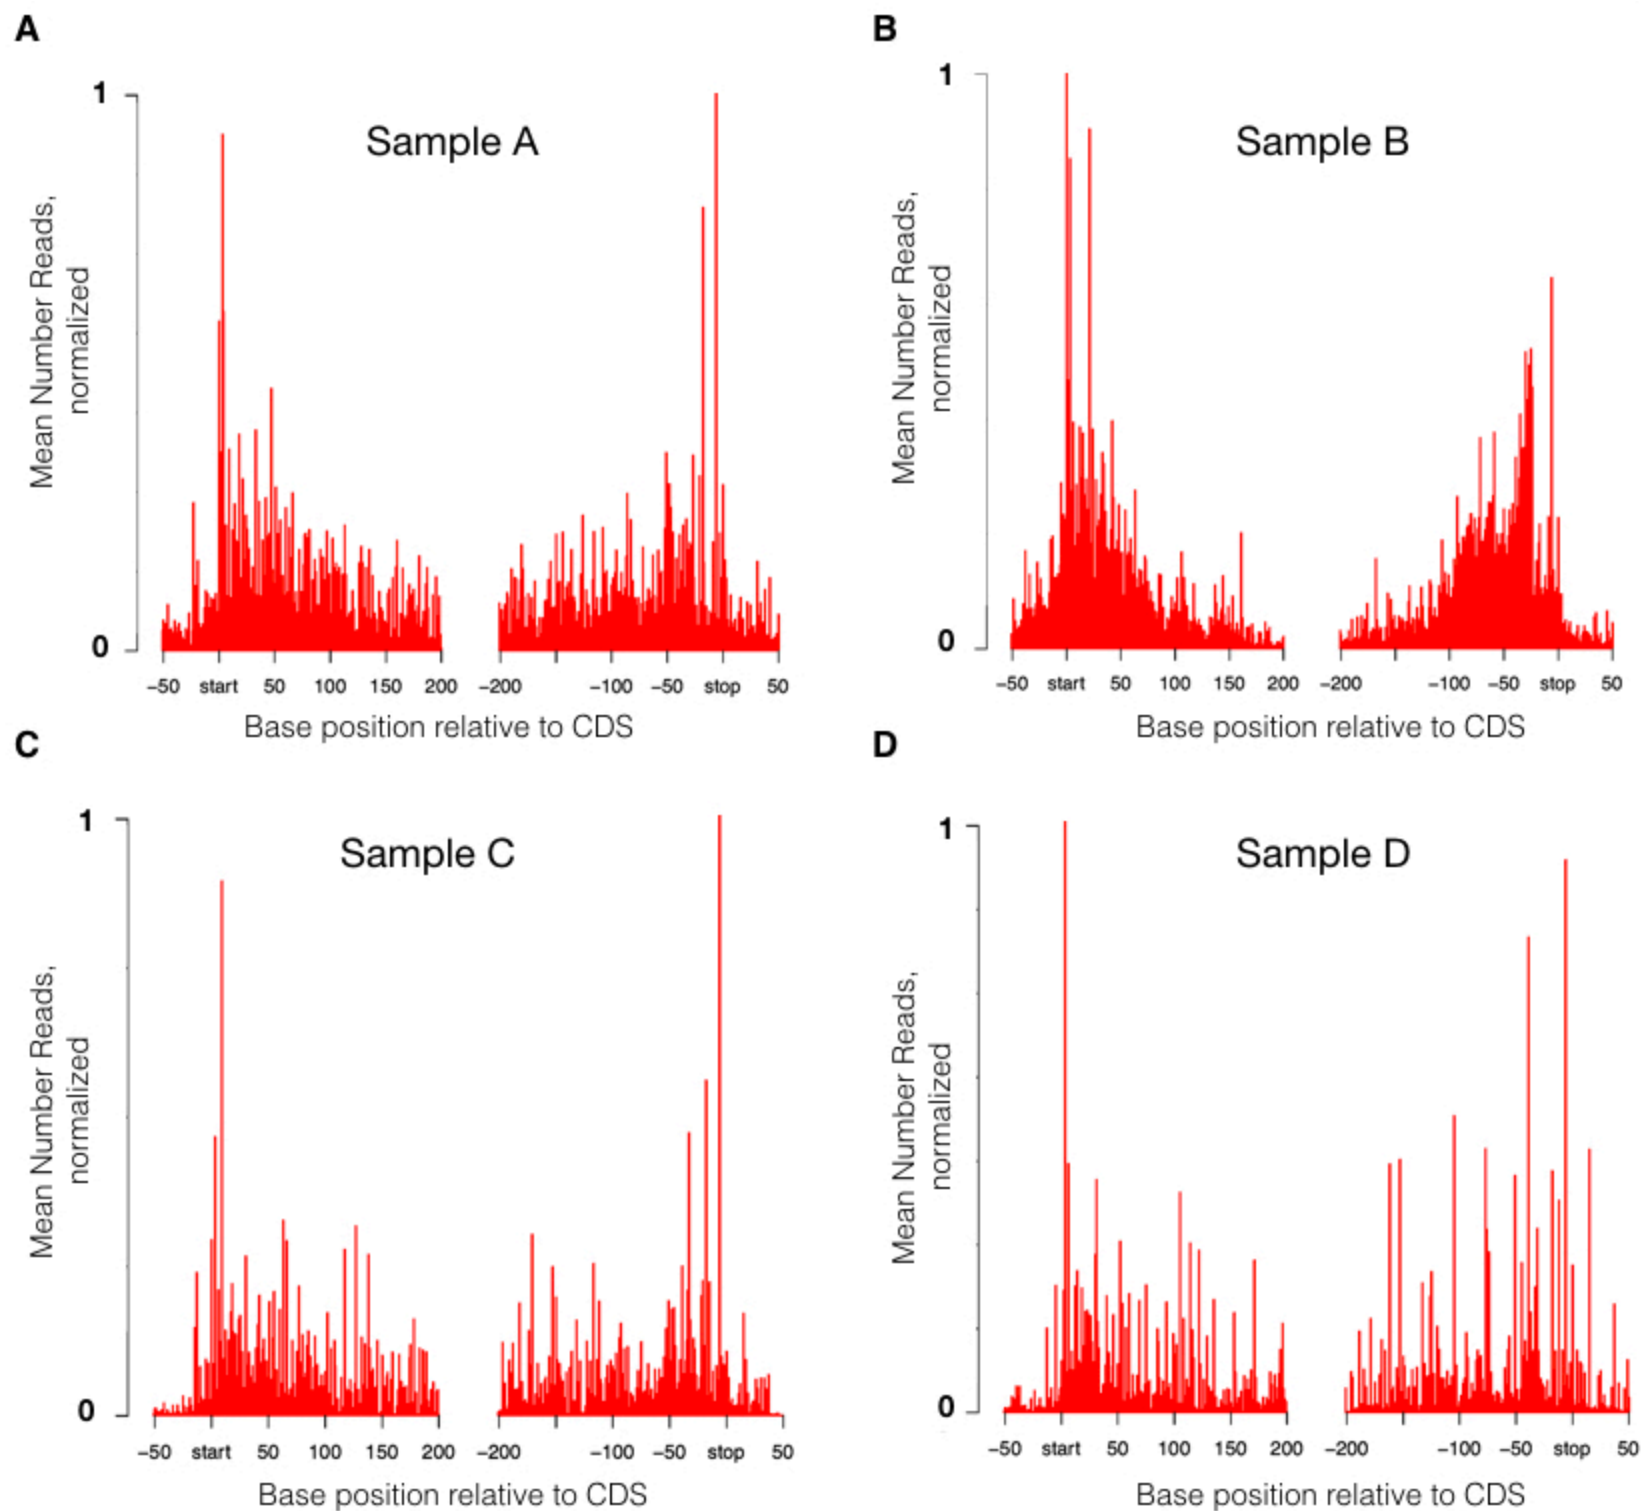

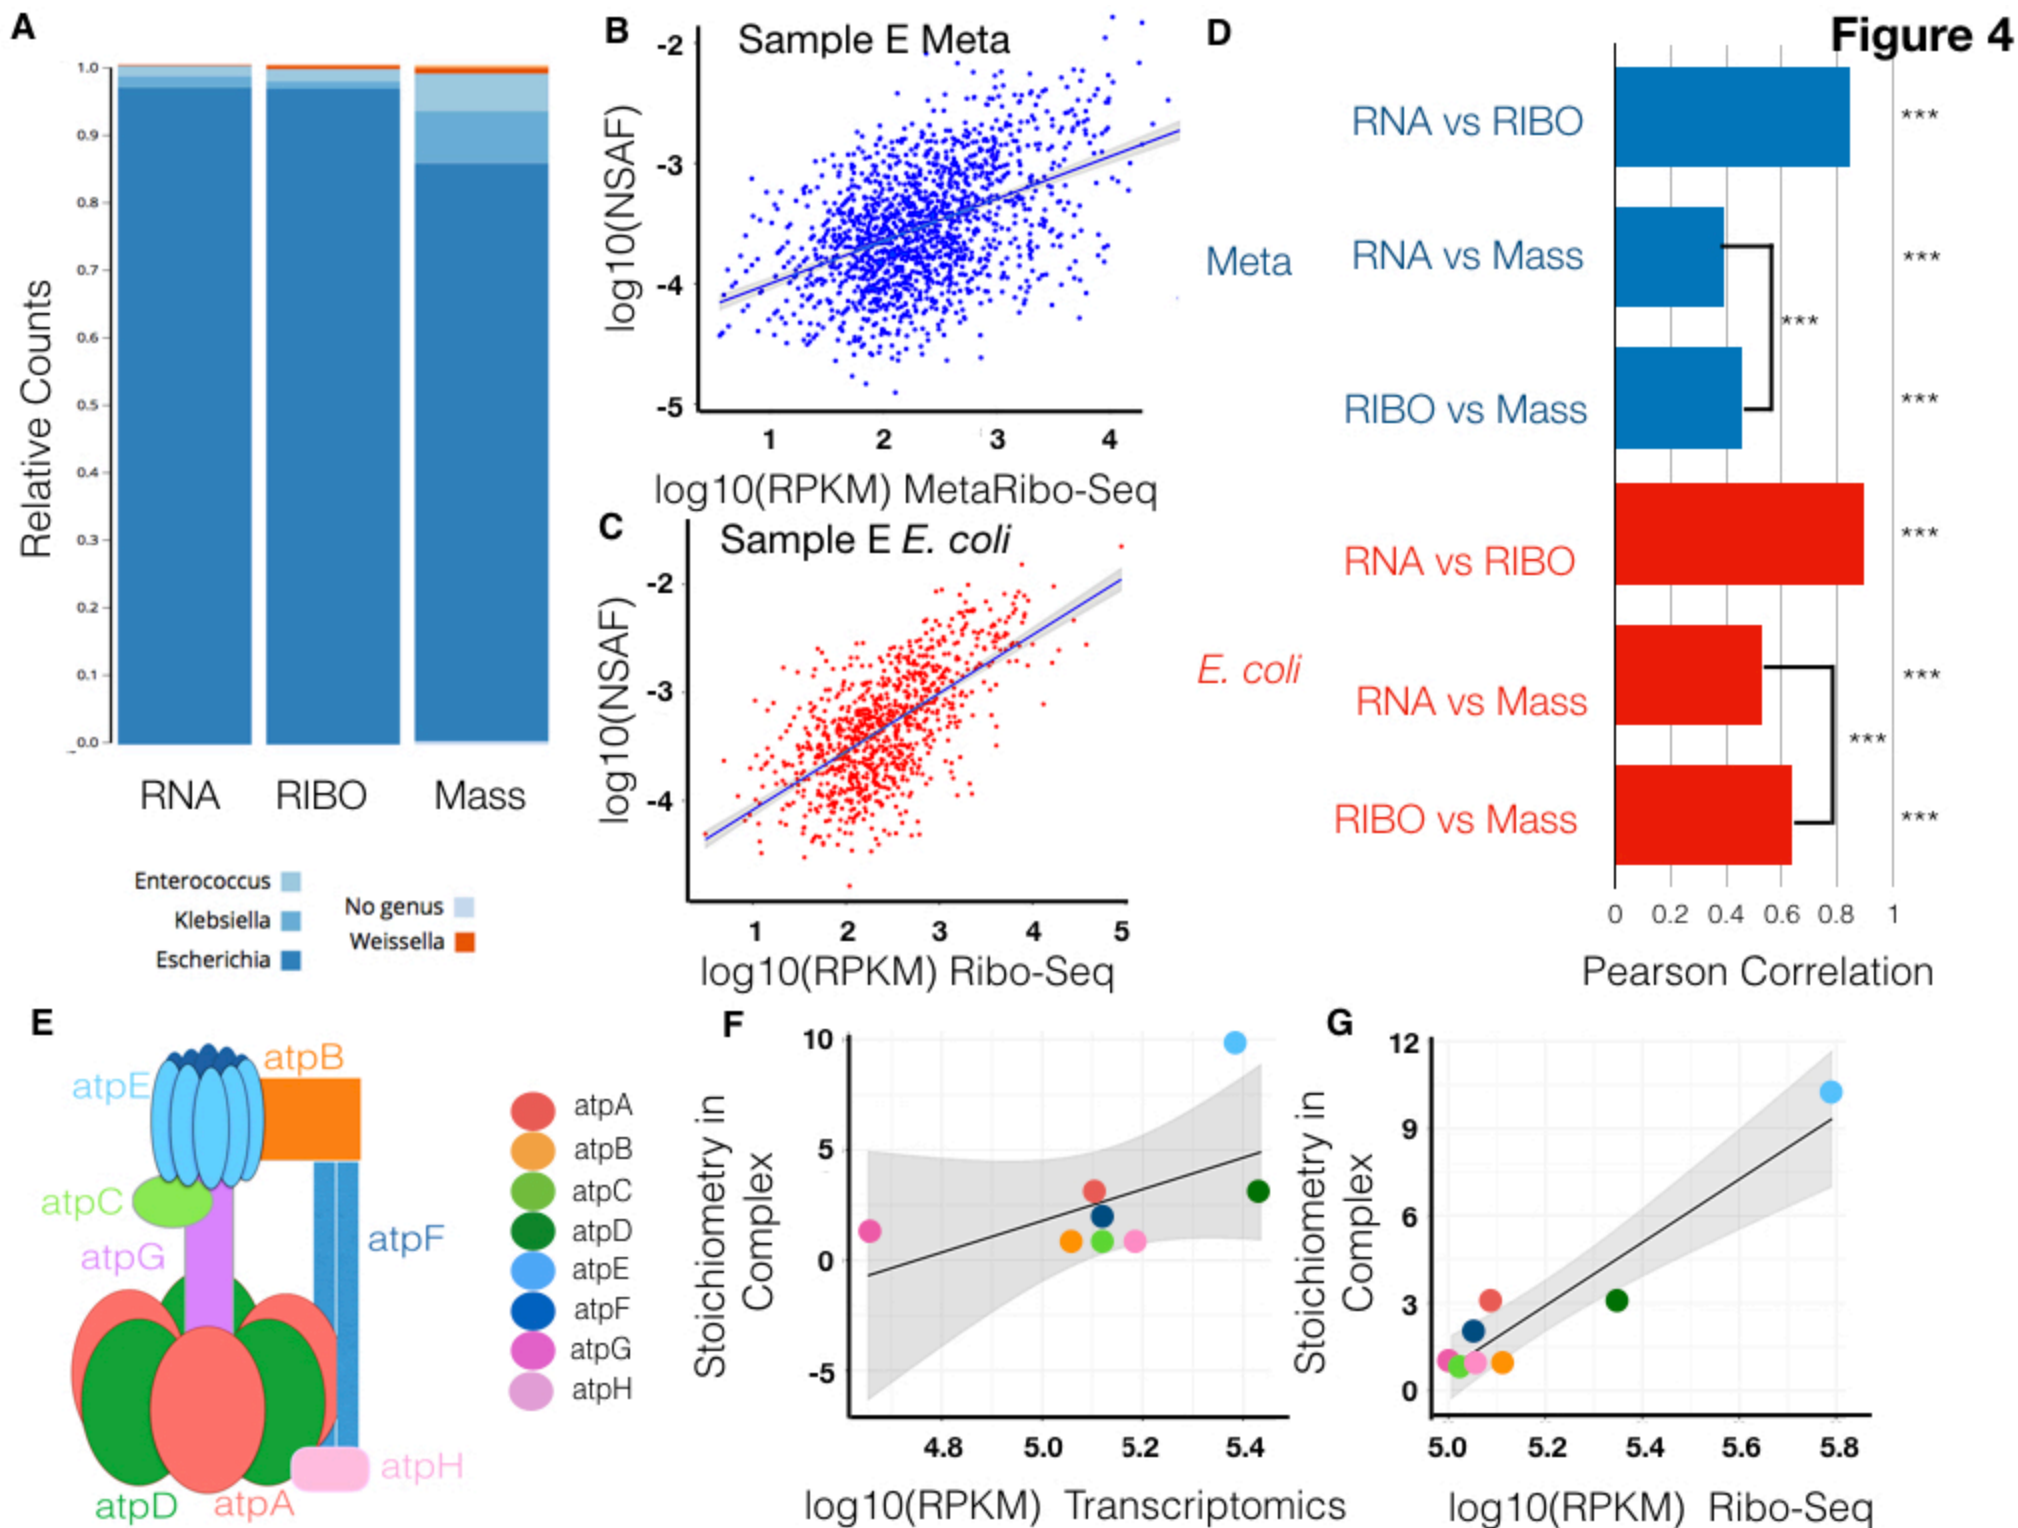

**Figure 5**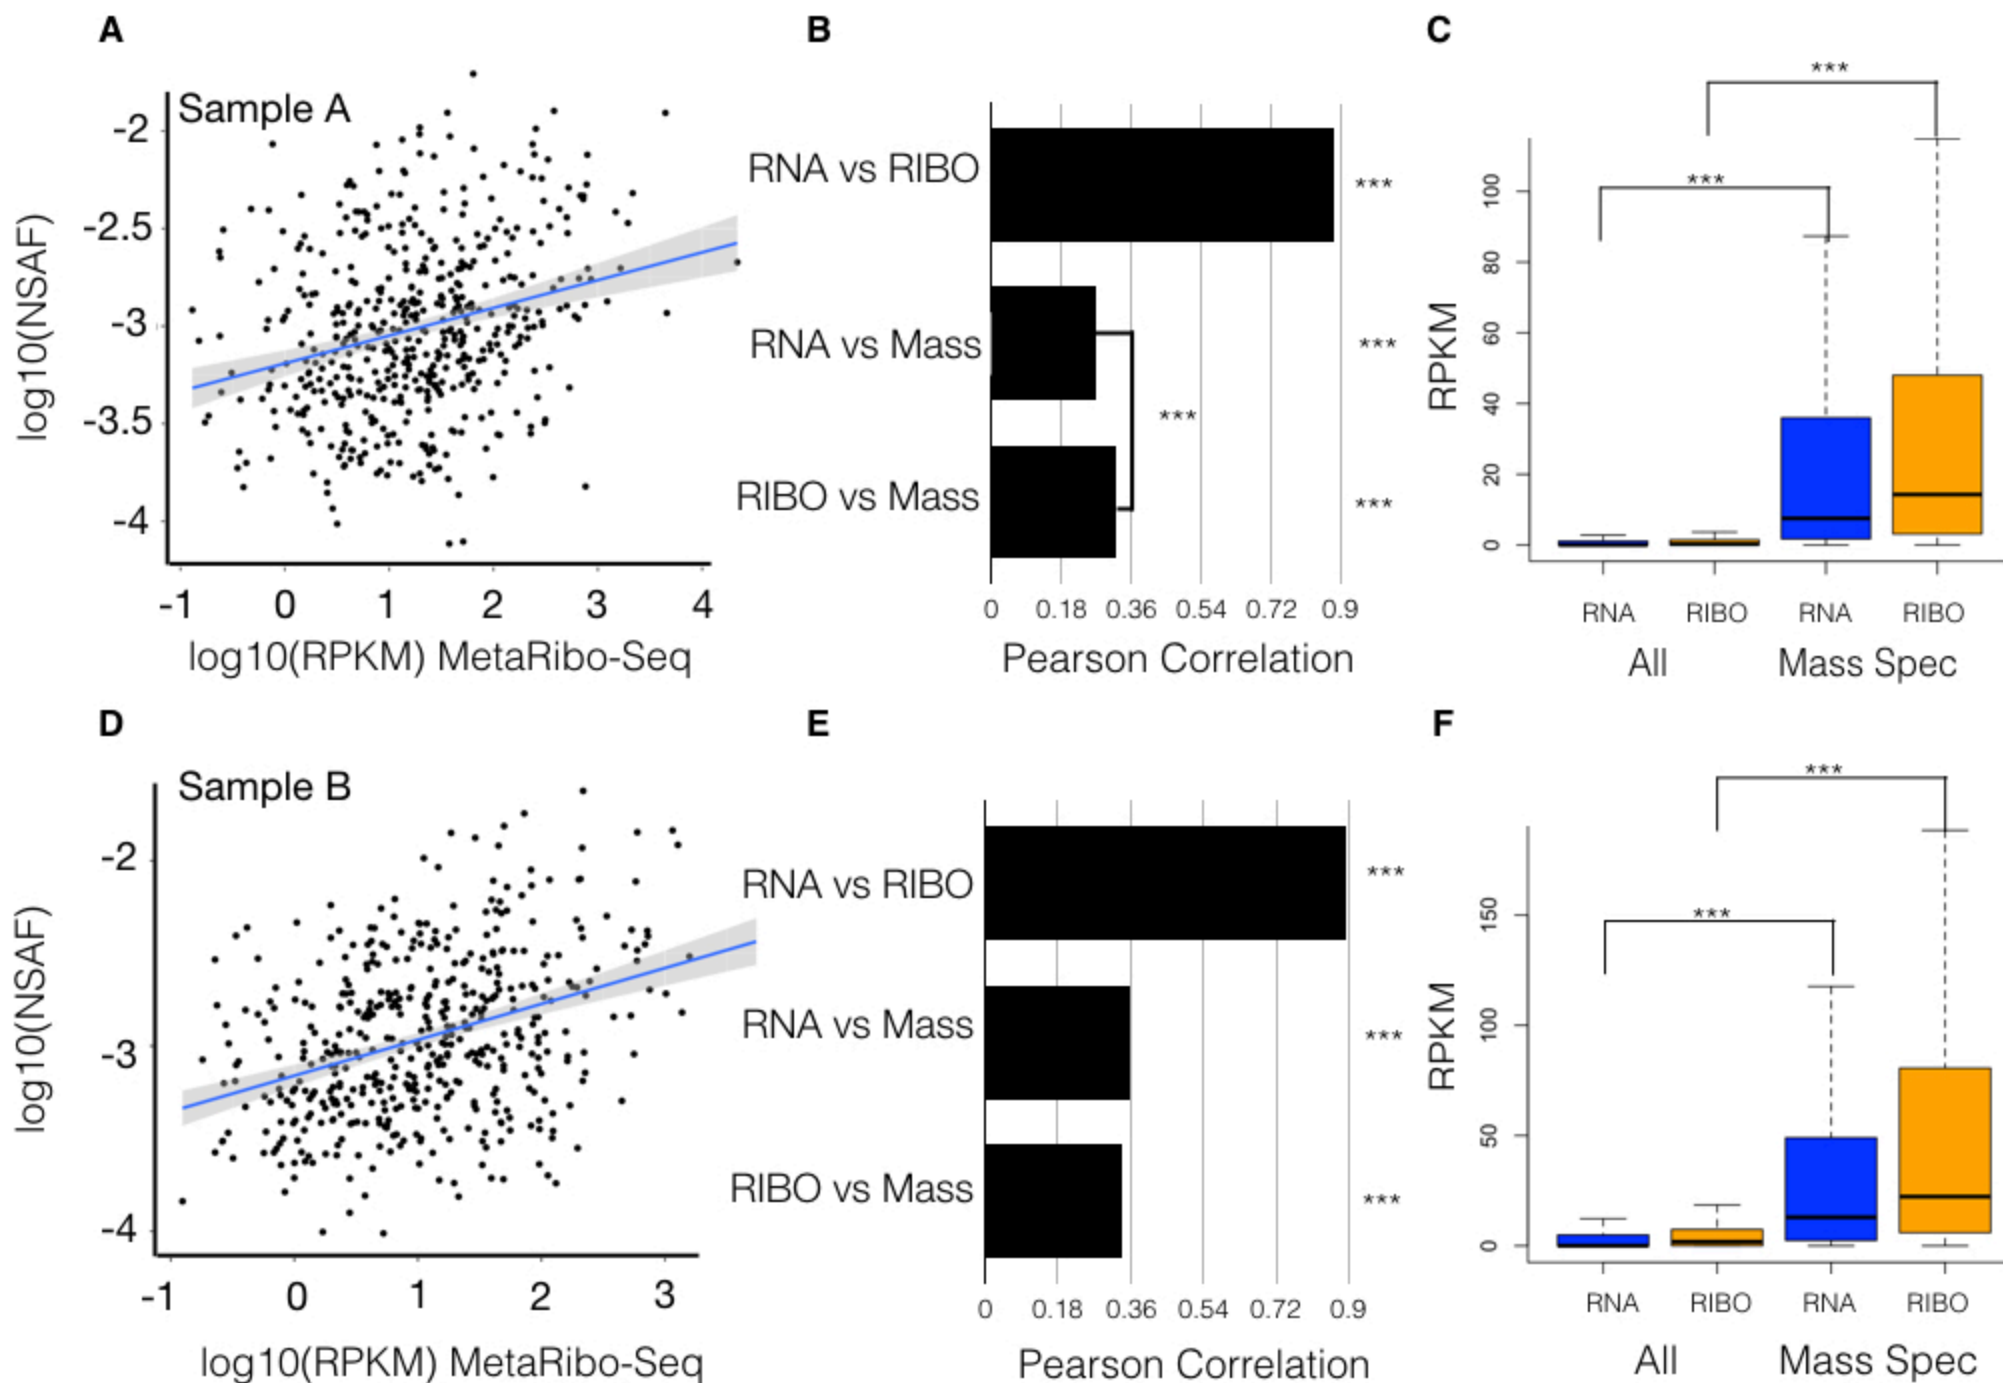

**Figure 6**

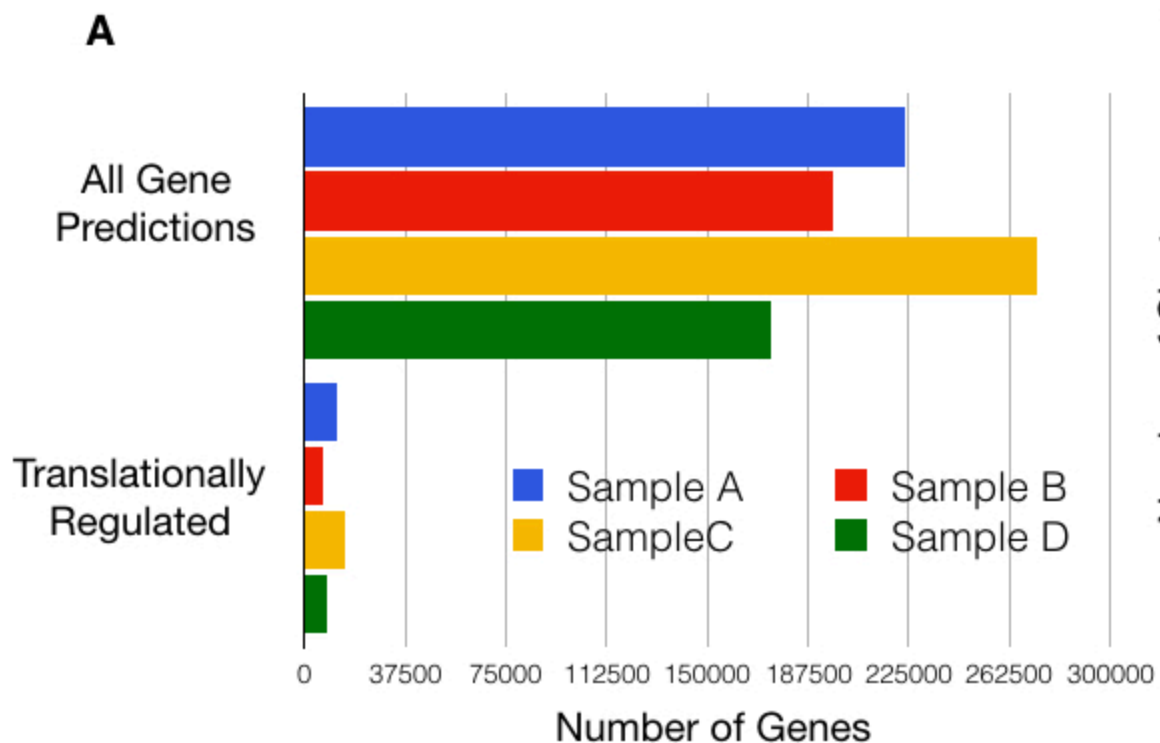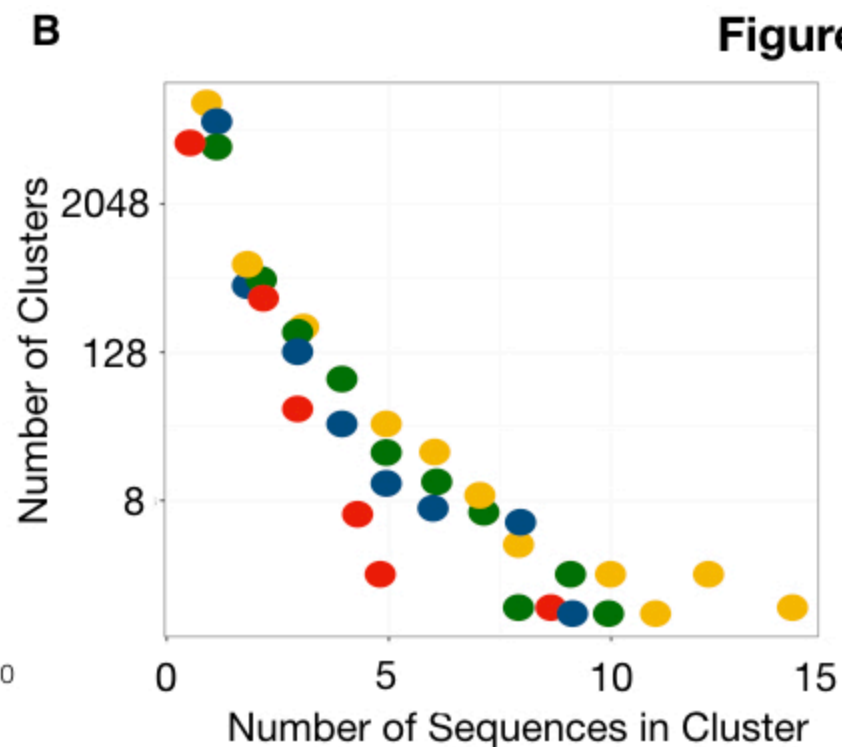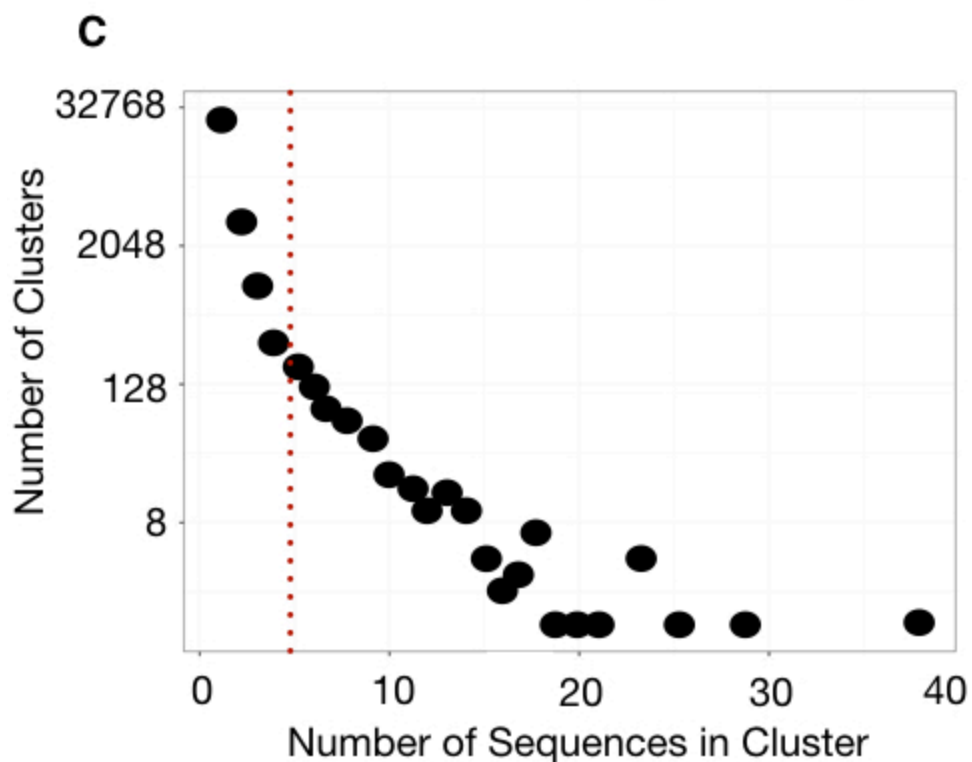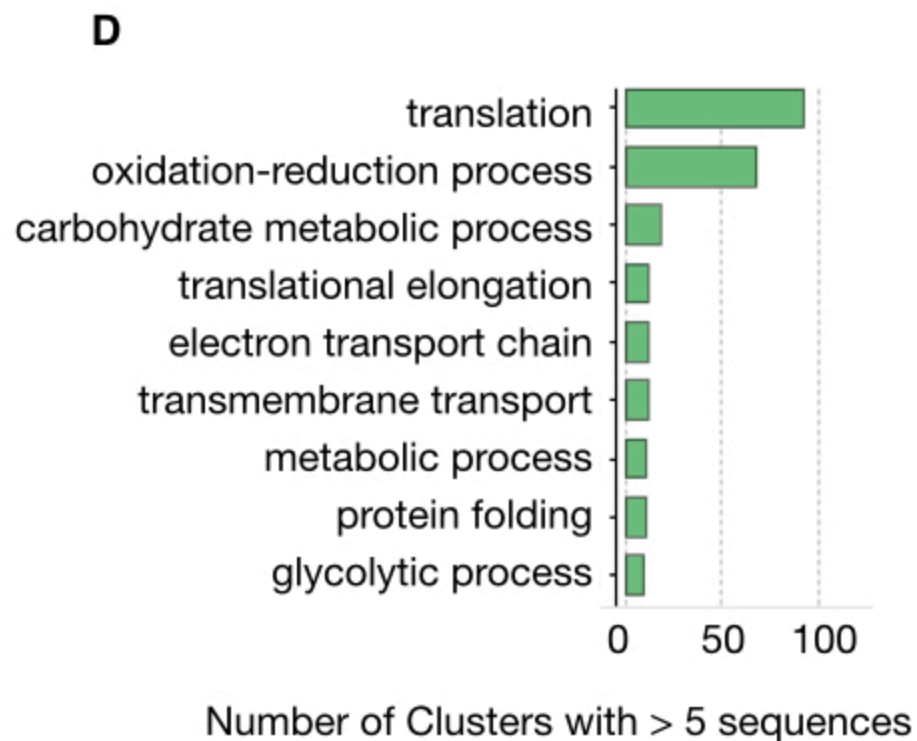

**Figure S1**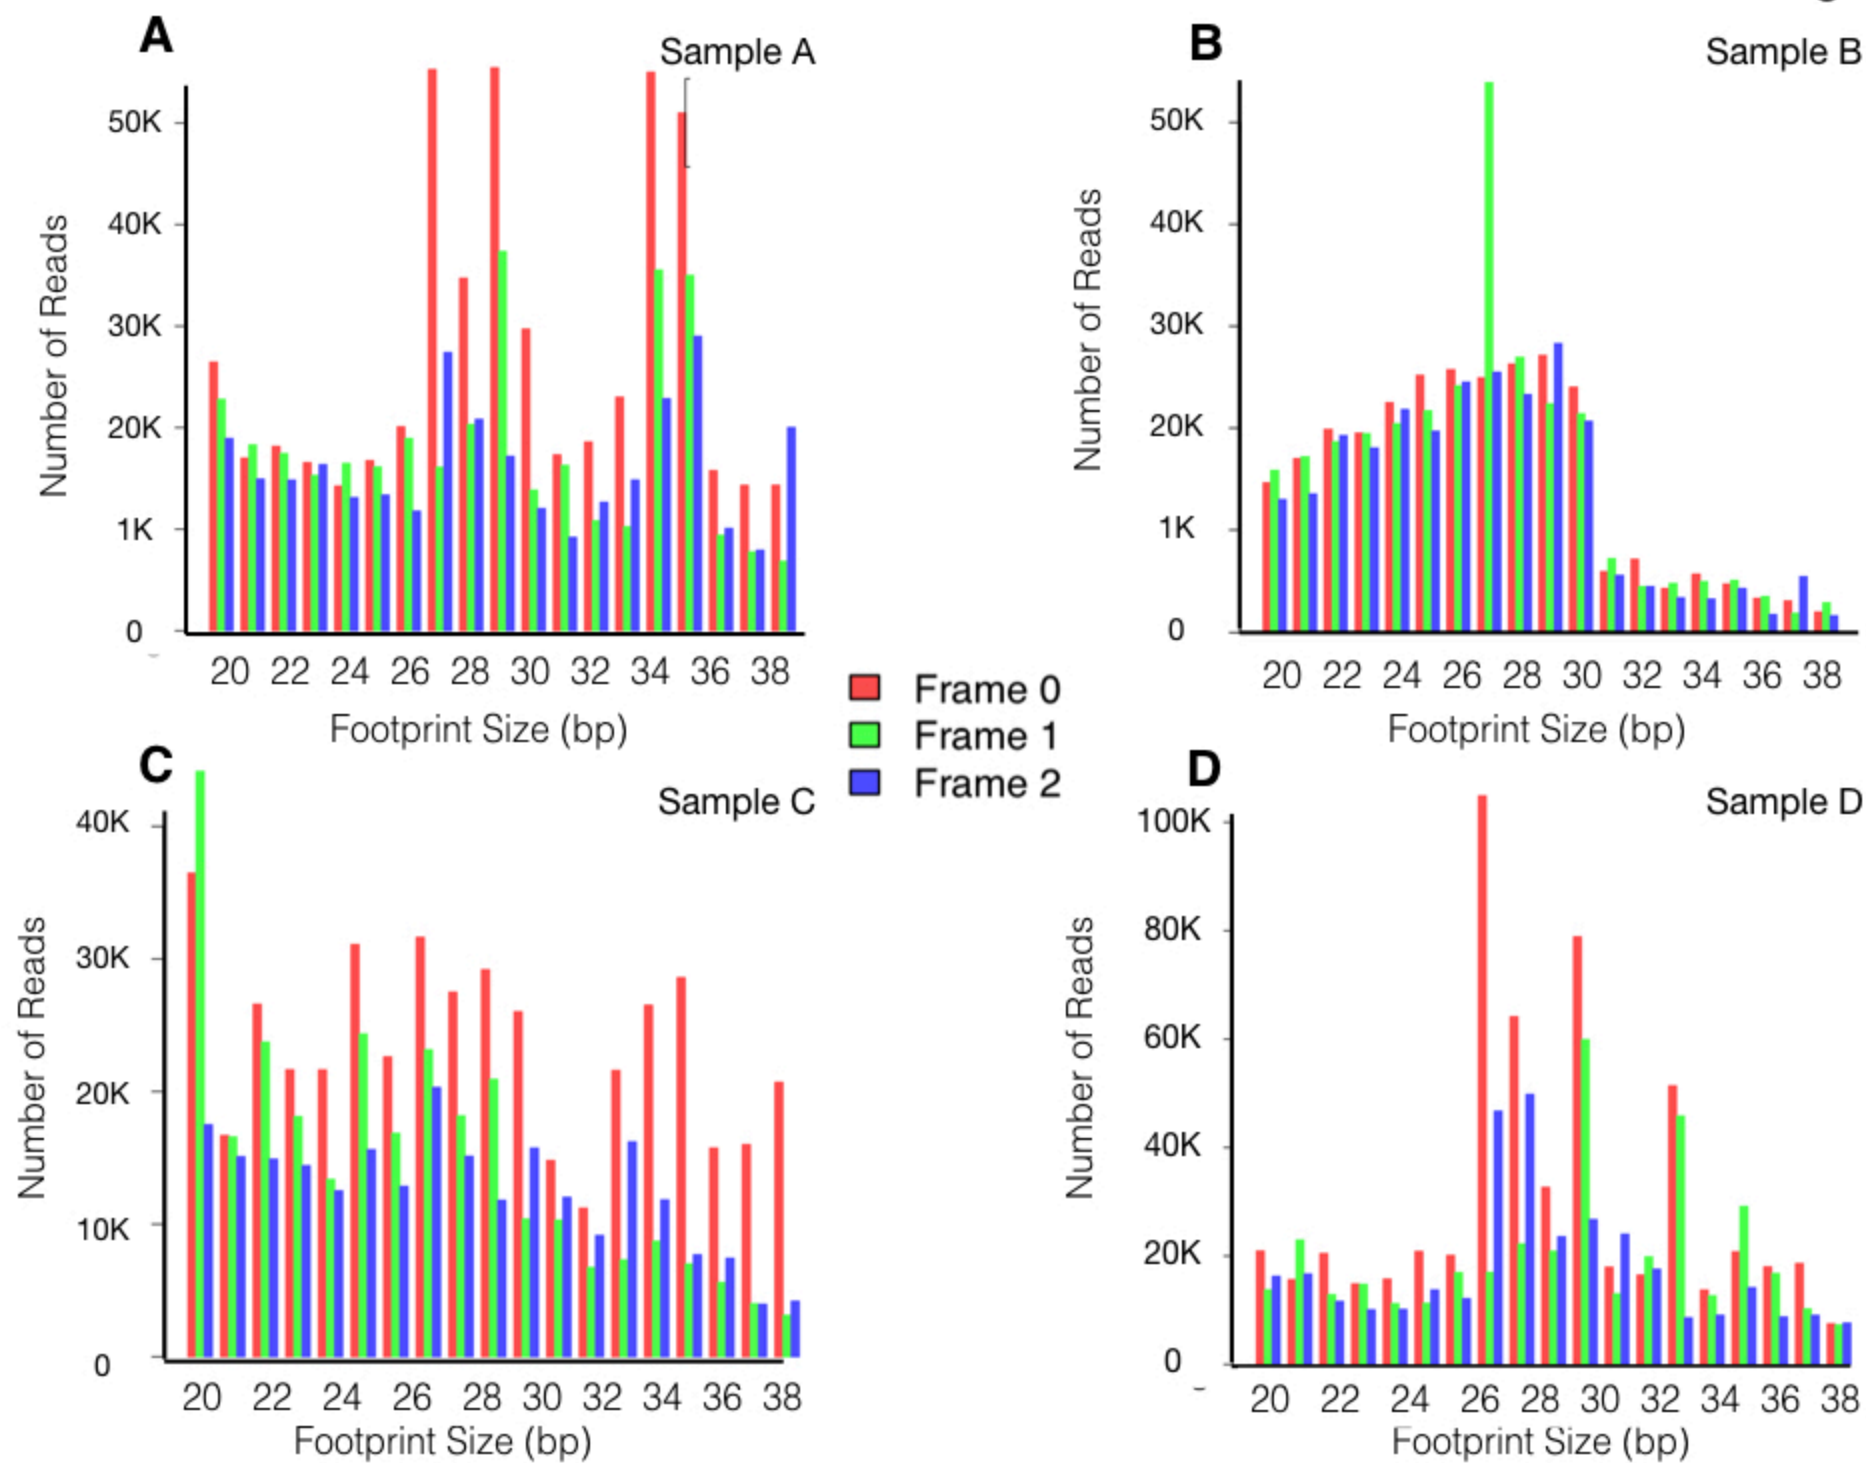

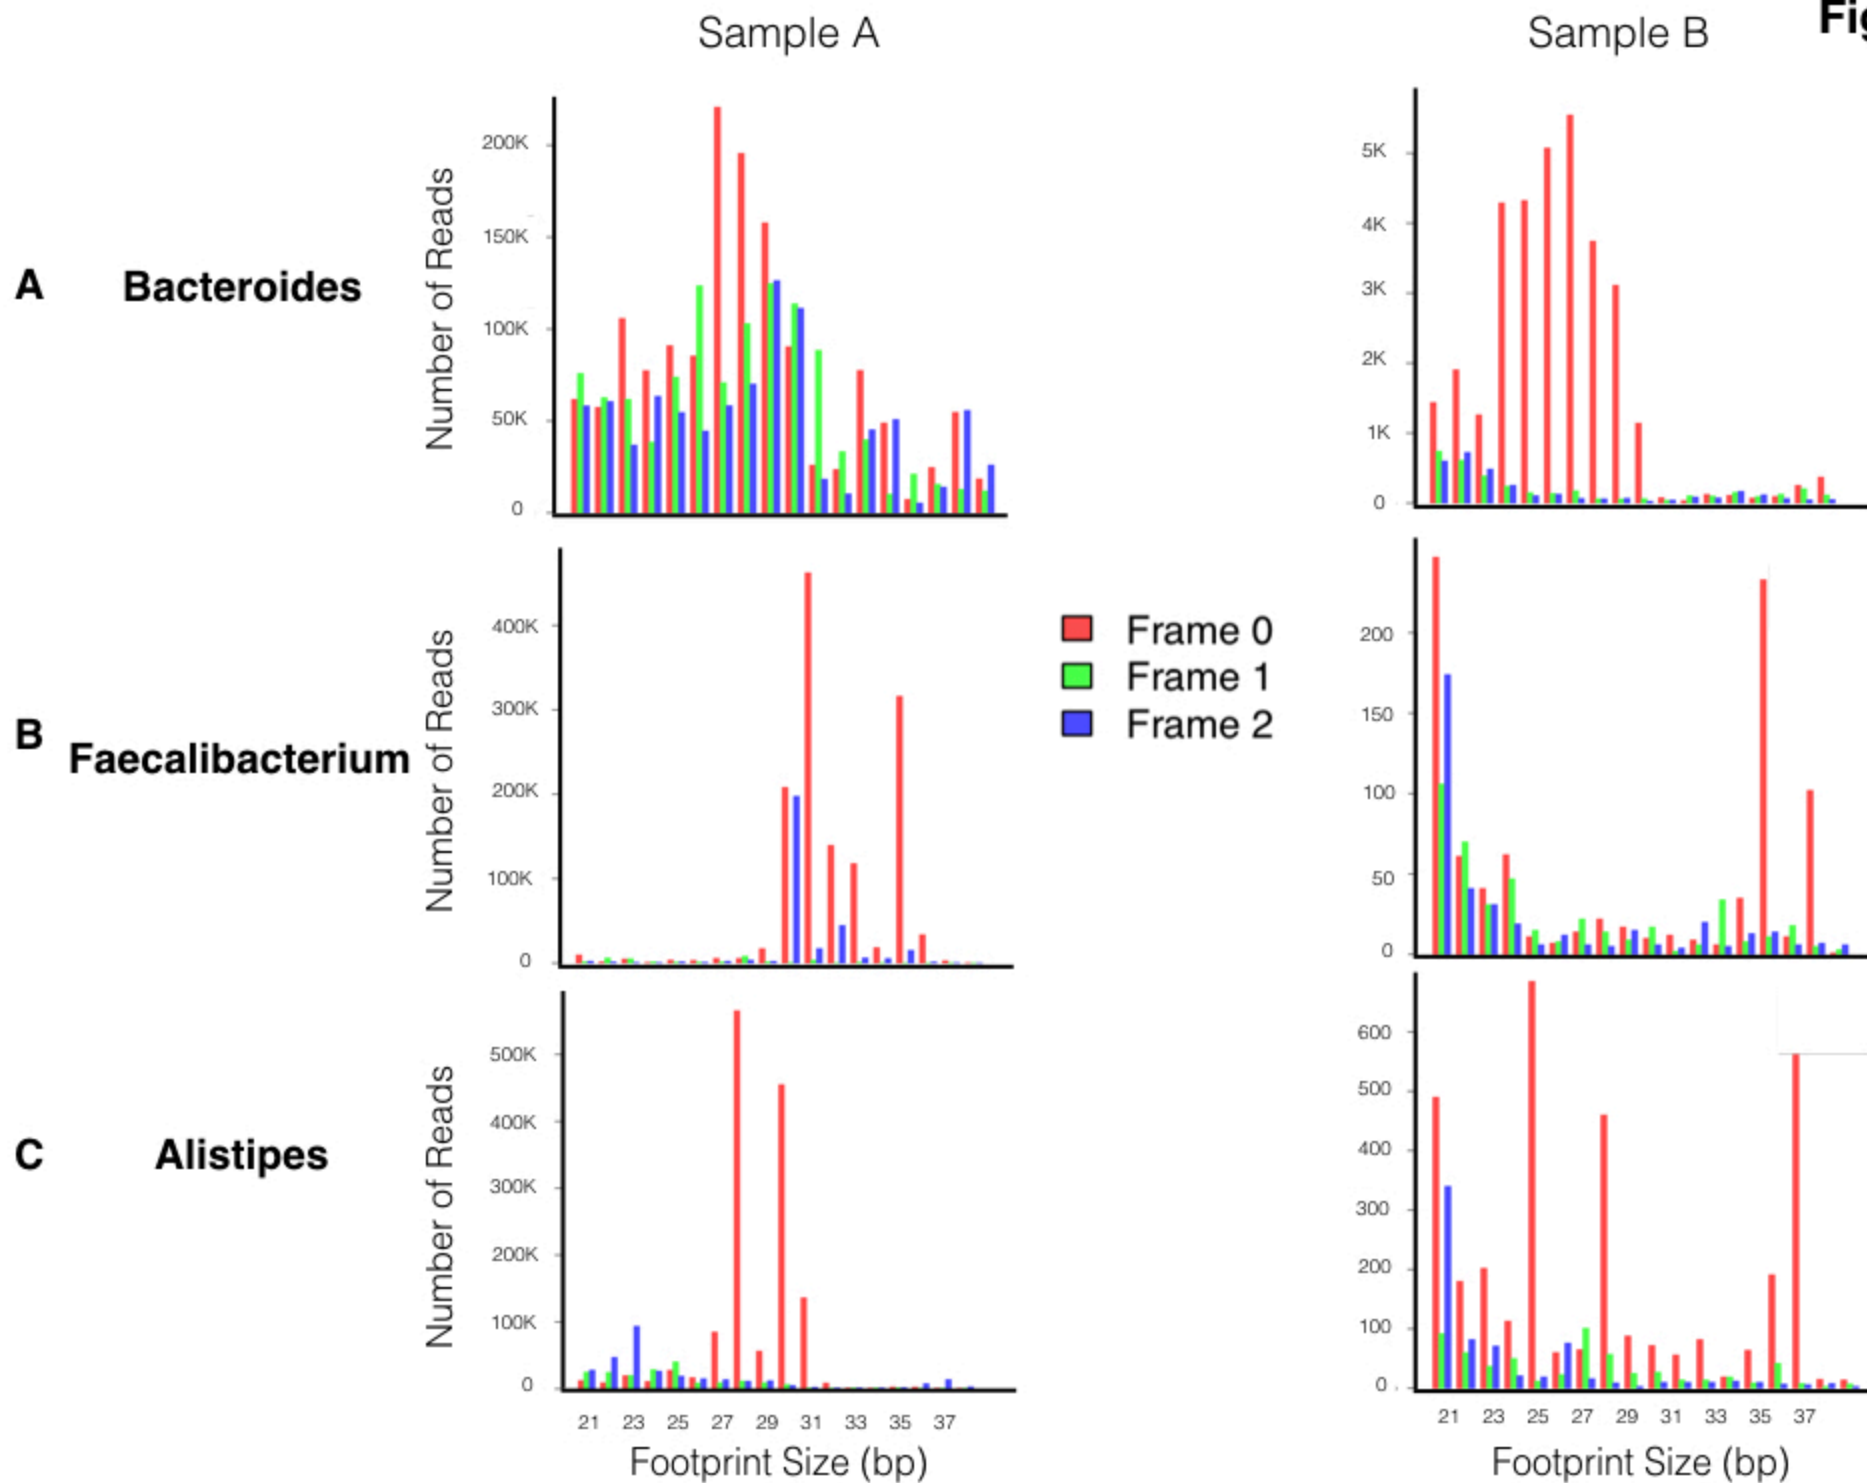

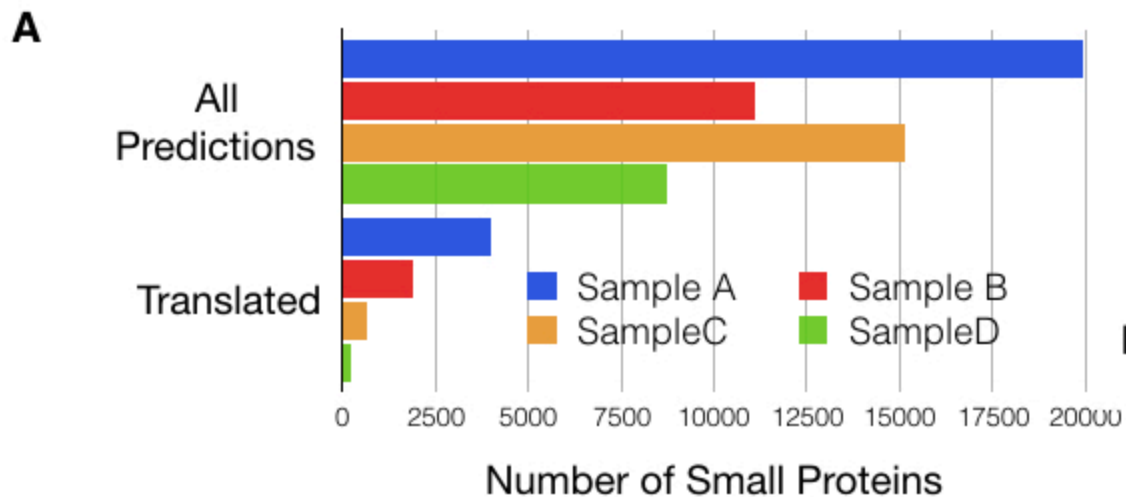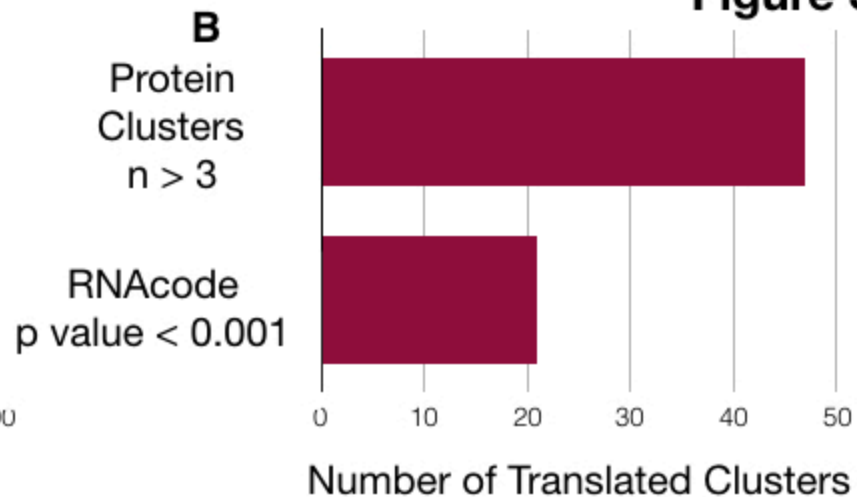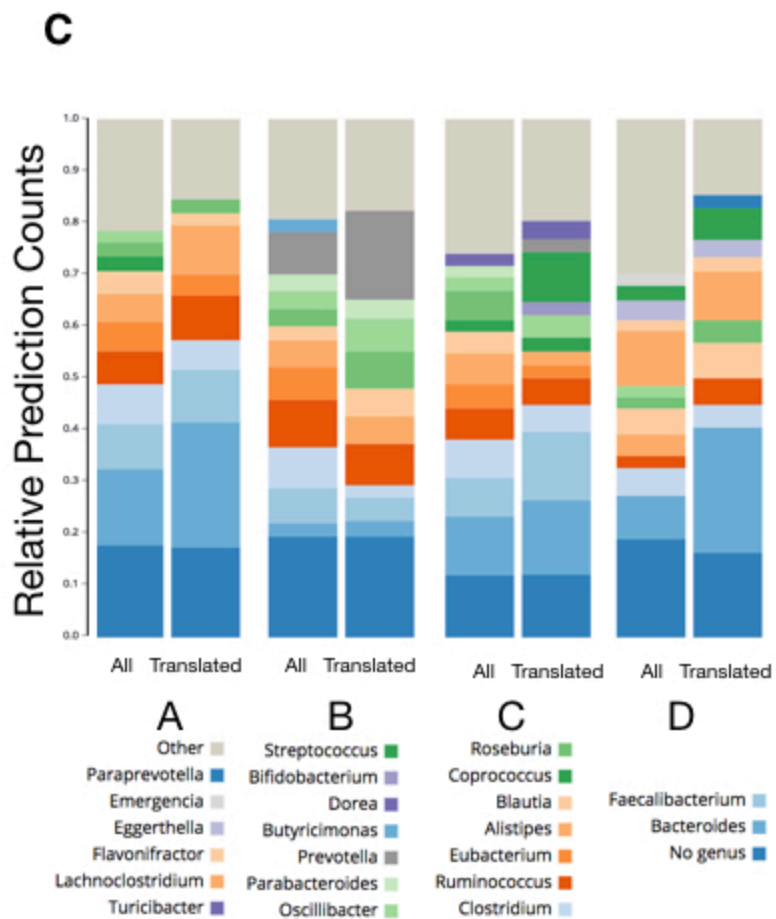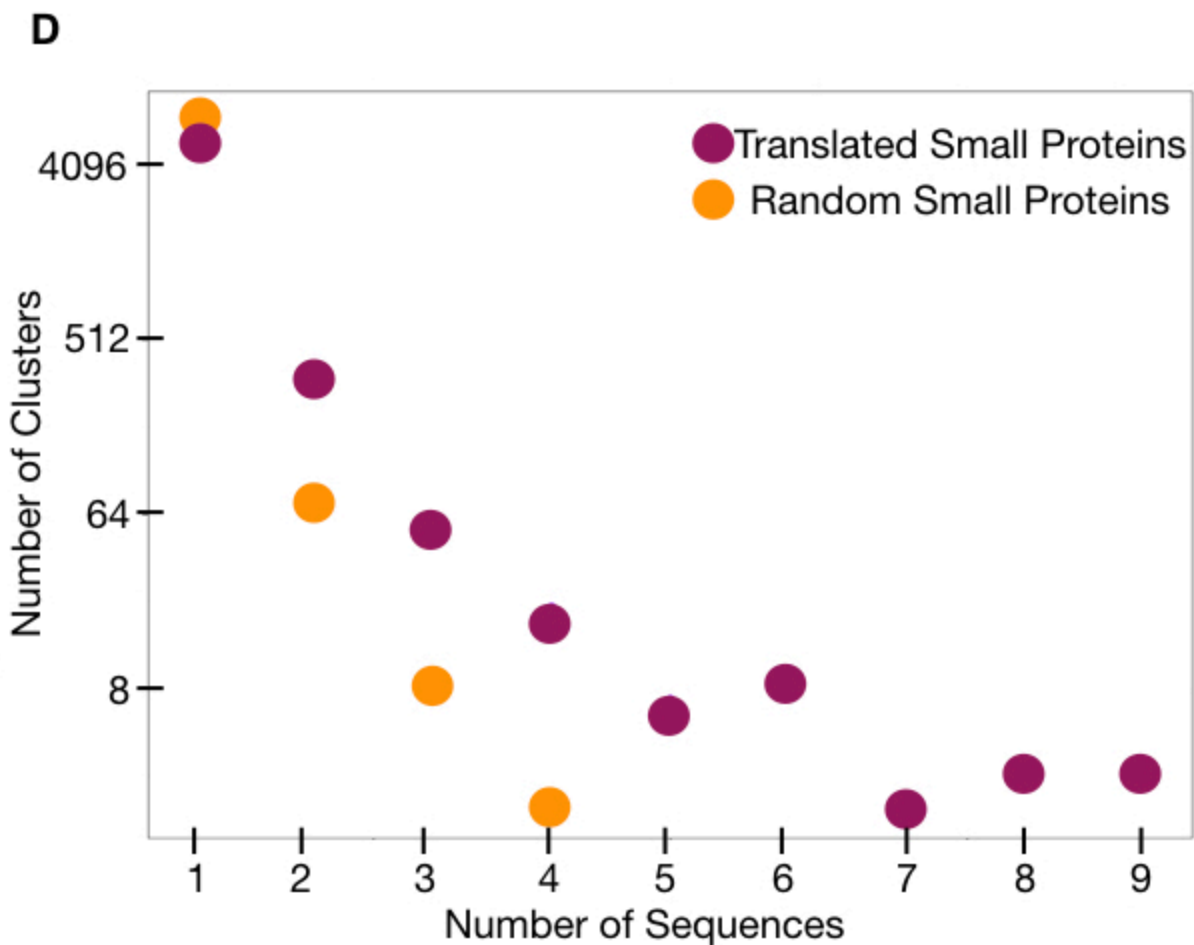



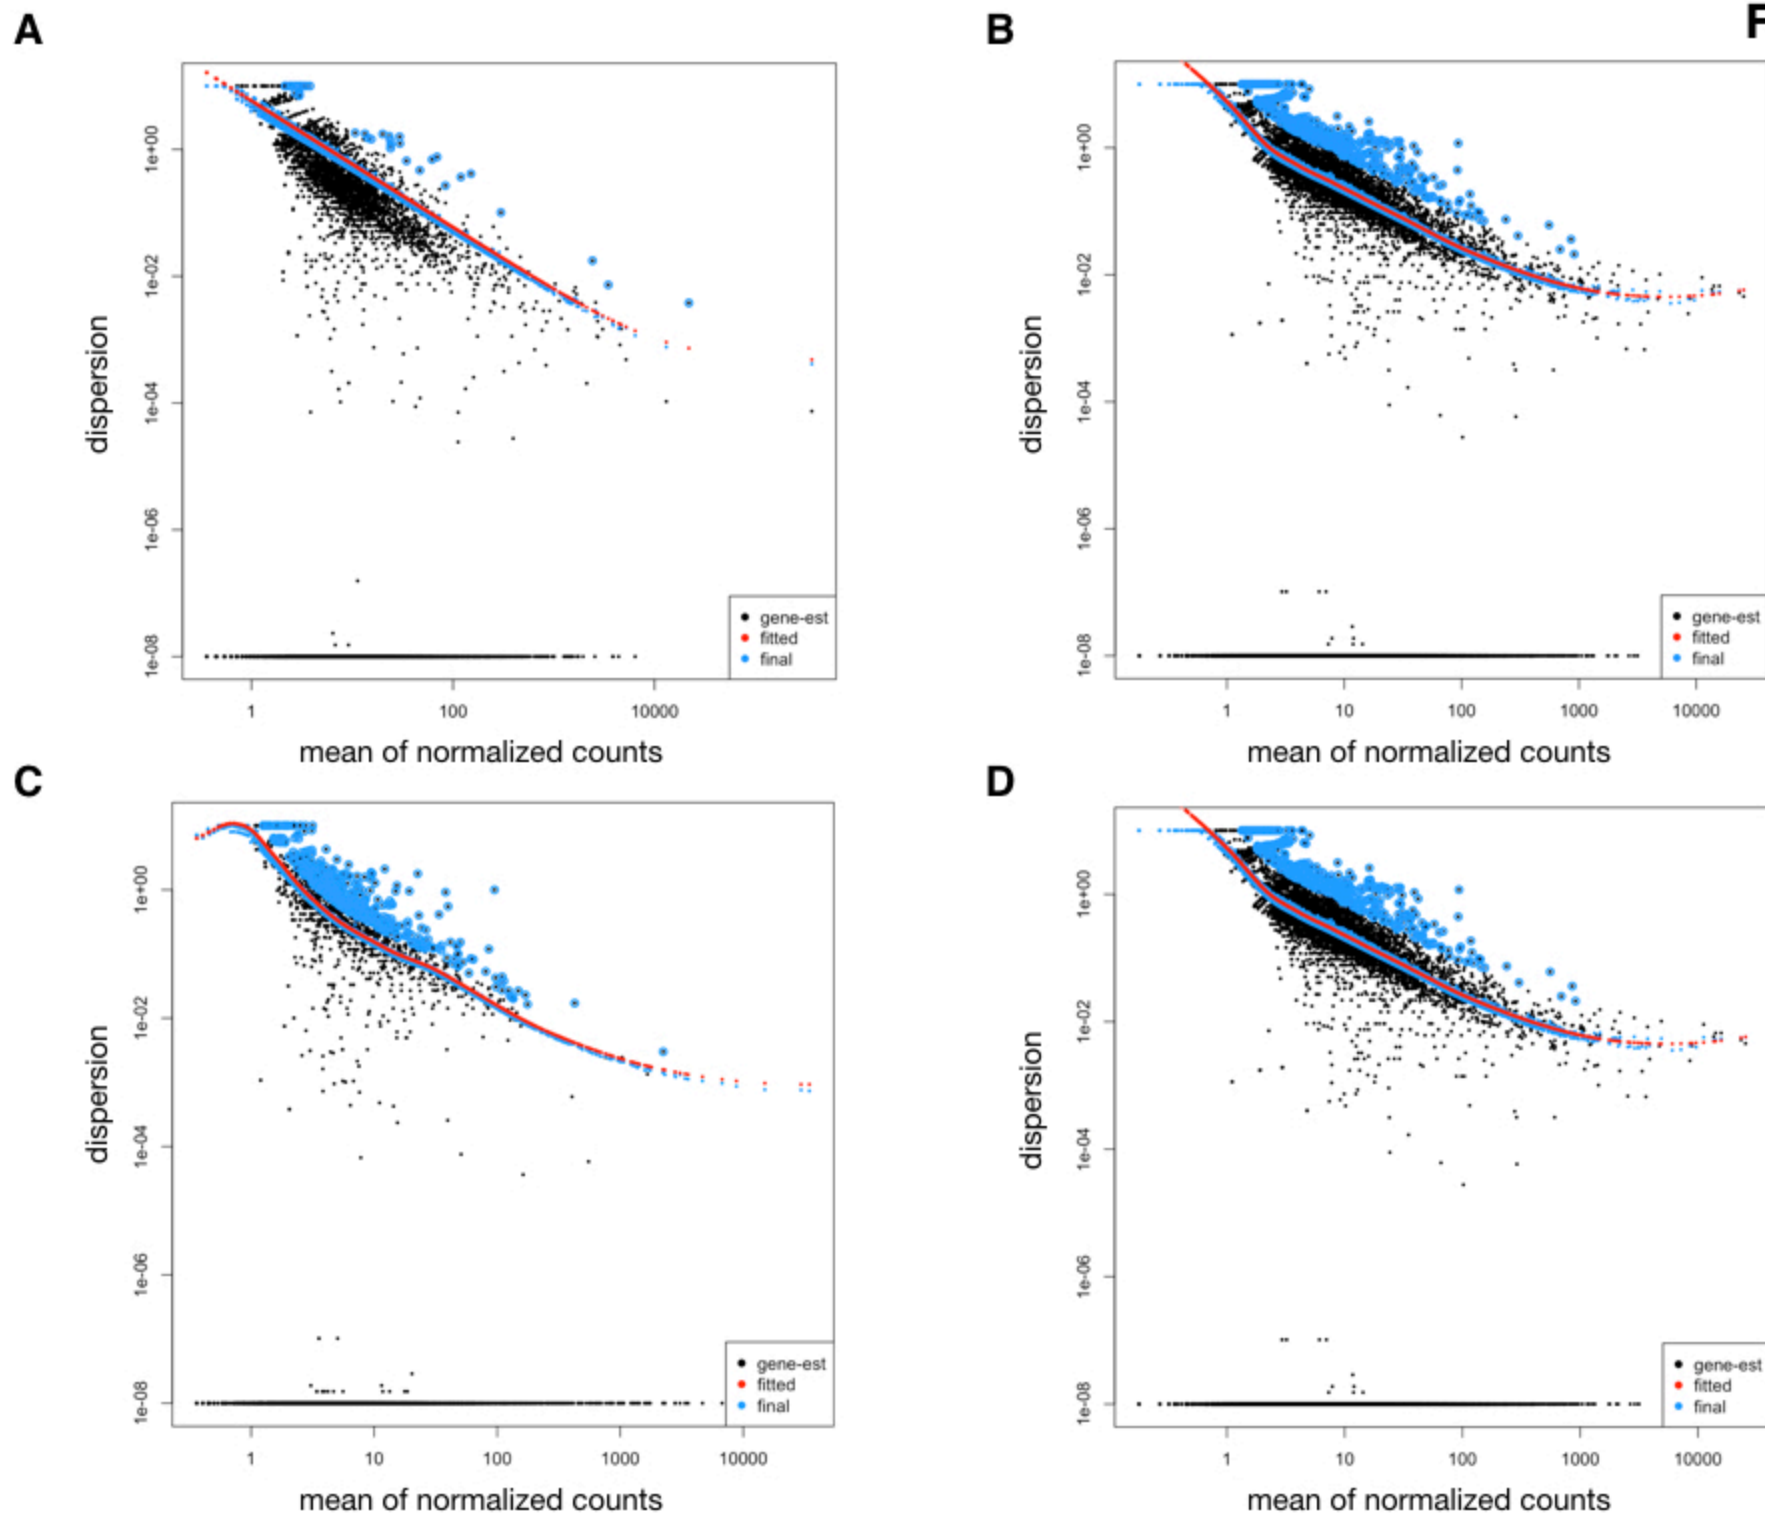

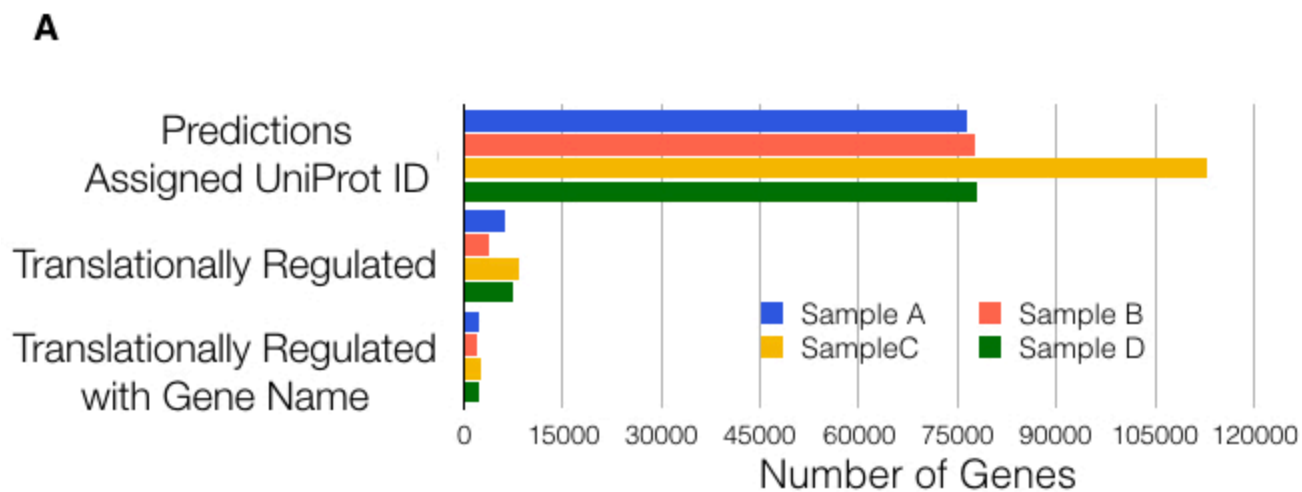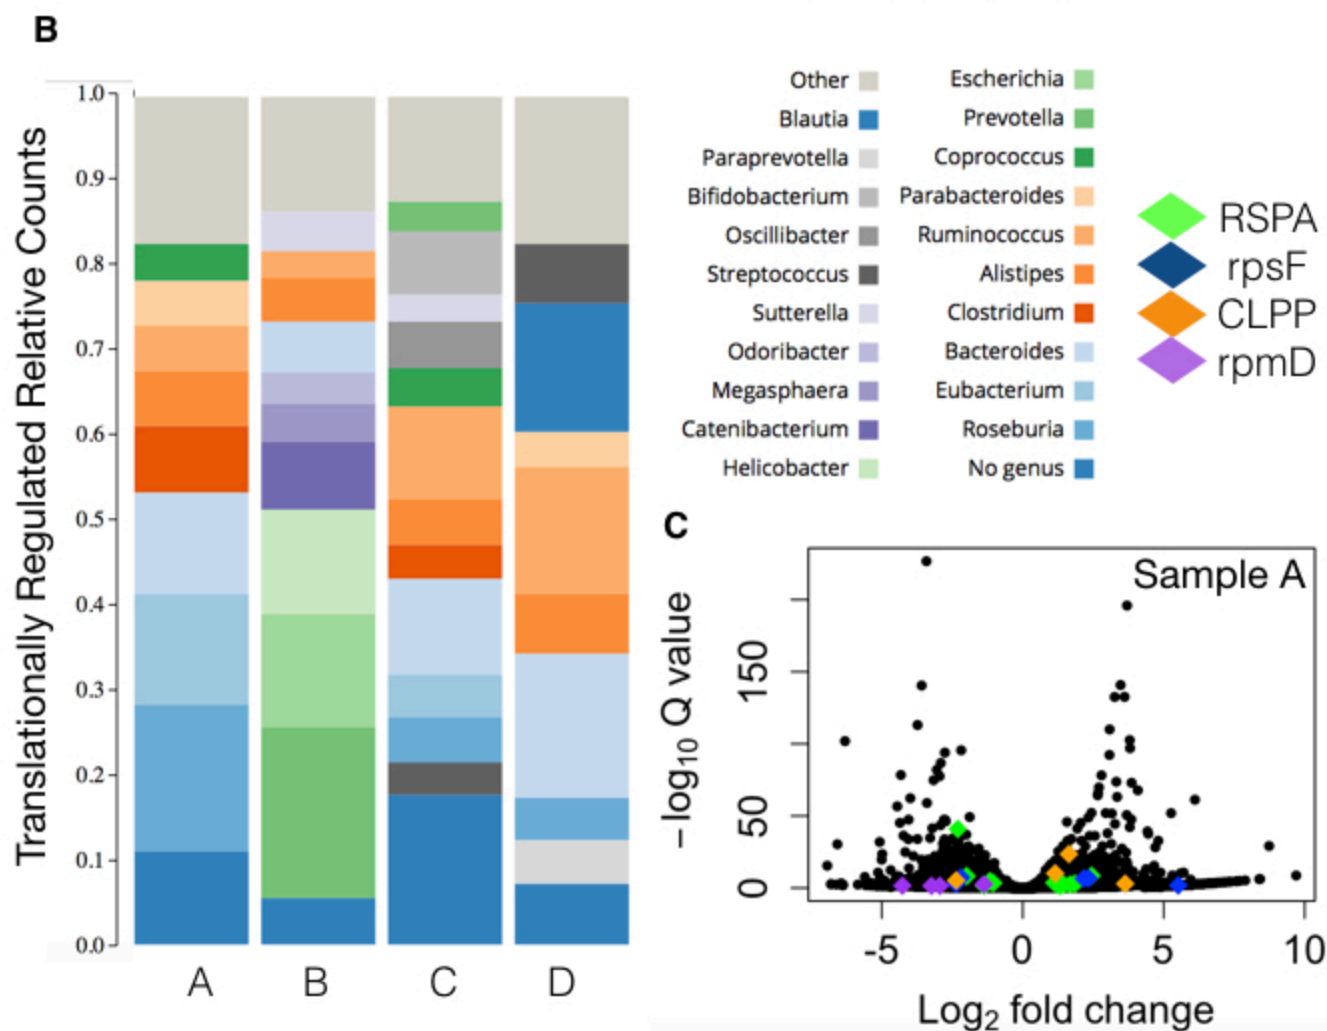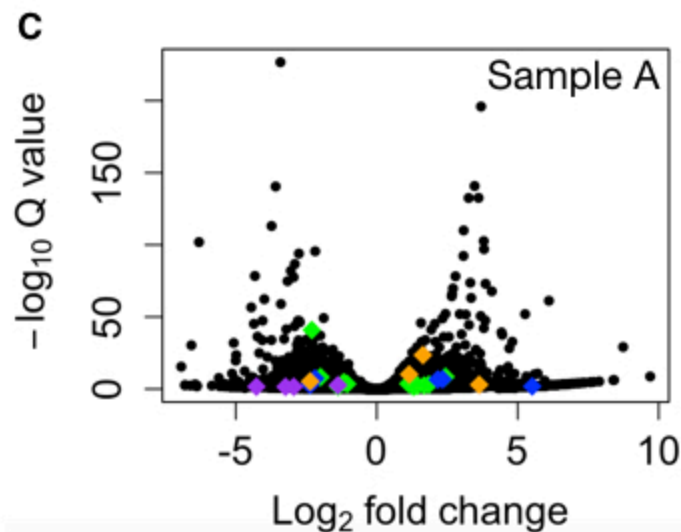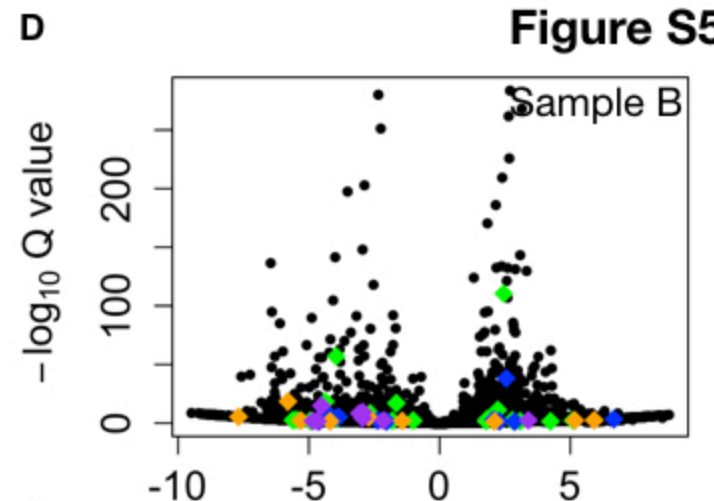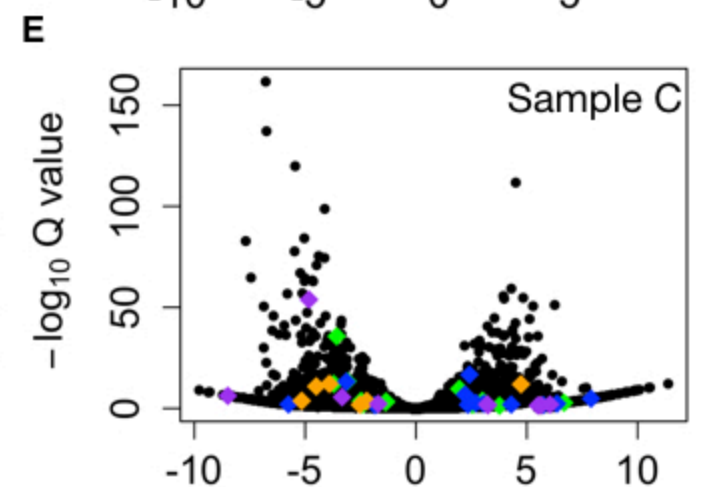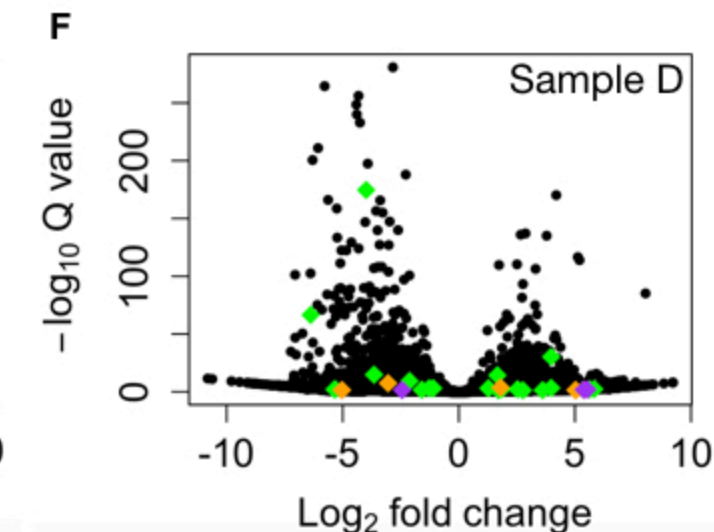

Figure S6

**A**

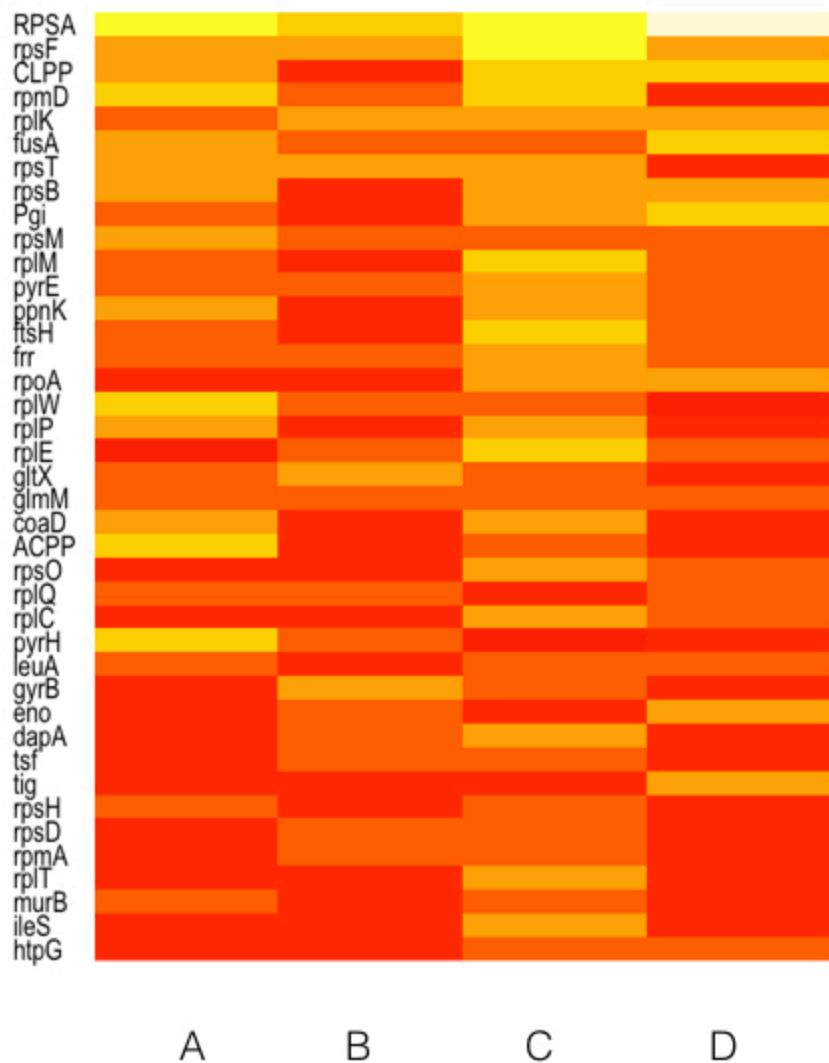

**B**

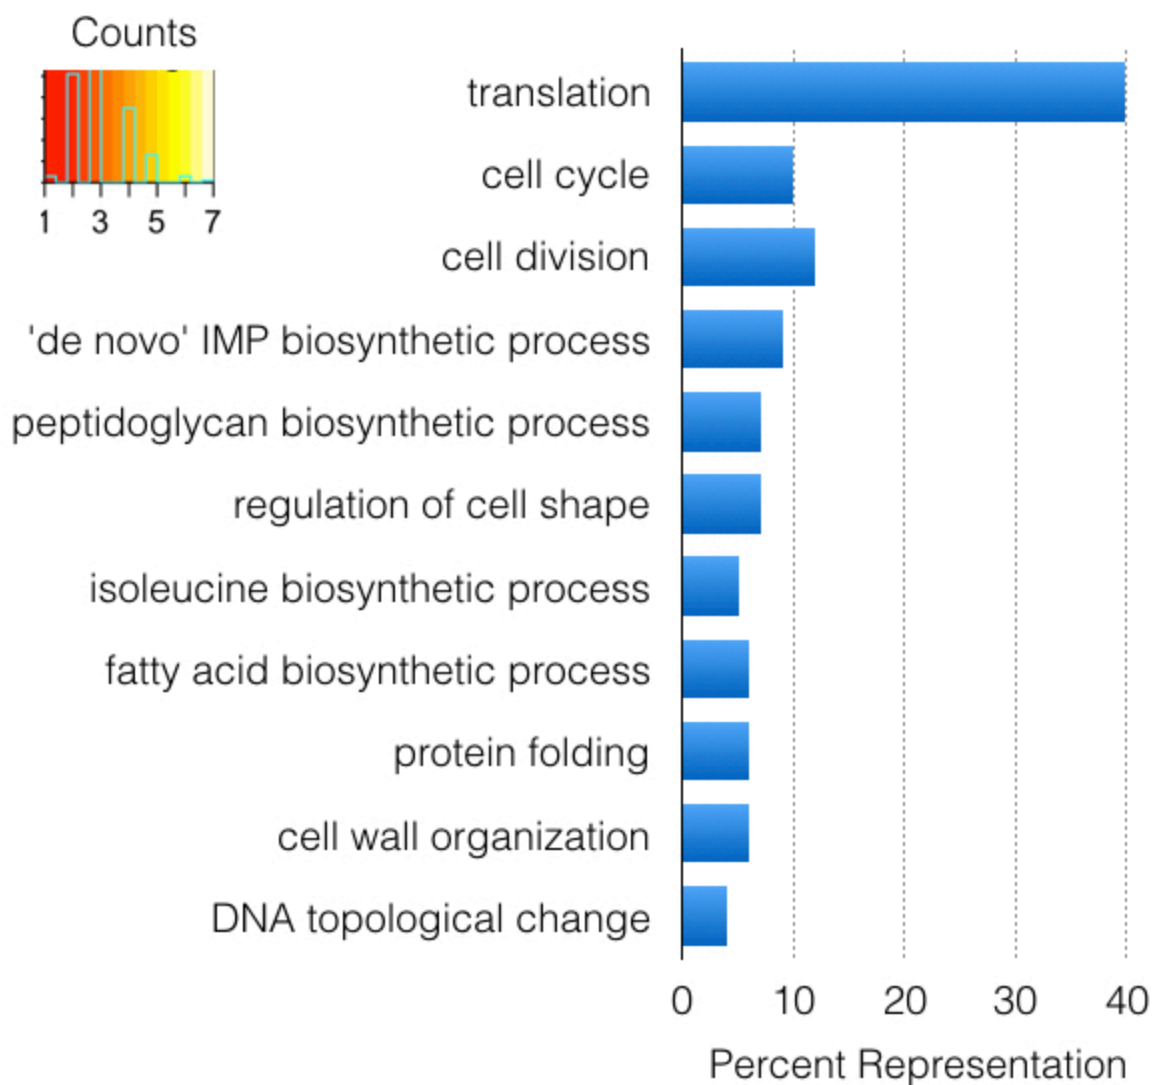

Source: https://www.biorxiv.org/content/10.1101/482430v1.full.pdf
